# Supplementary material for: Identification of Critical Genes for Ovine Horn Development Based on Transcriptome during the Embryonic Period
Source: MDPI journal article supplement (doi:10.3390/biology12040591), 2023-04-13
Supplement: s1 [file s1]

## Supplementary Figure

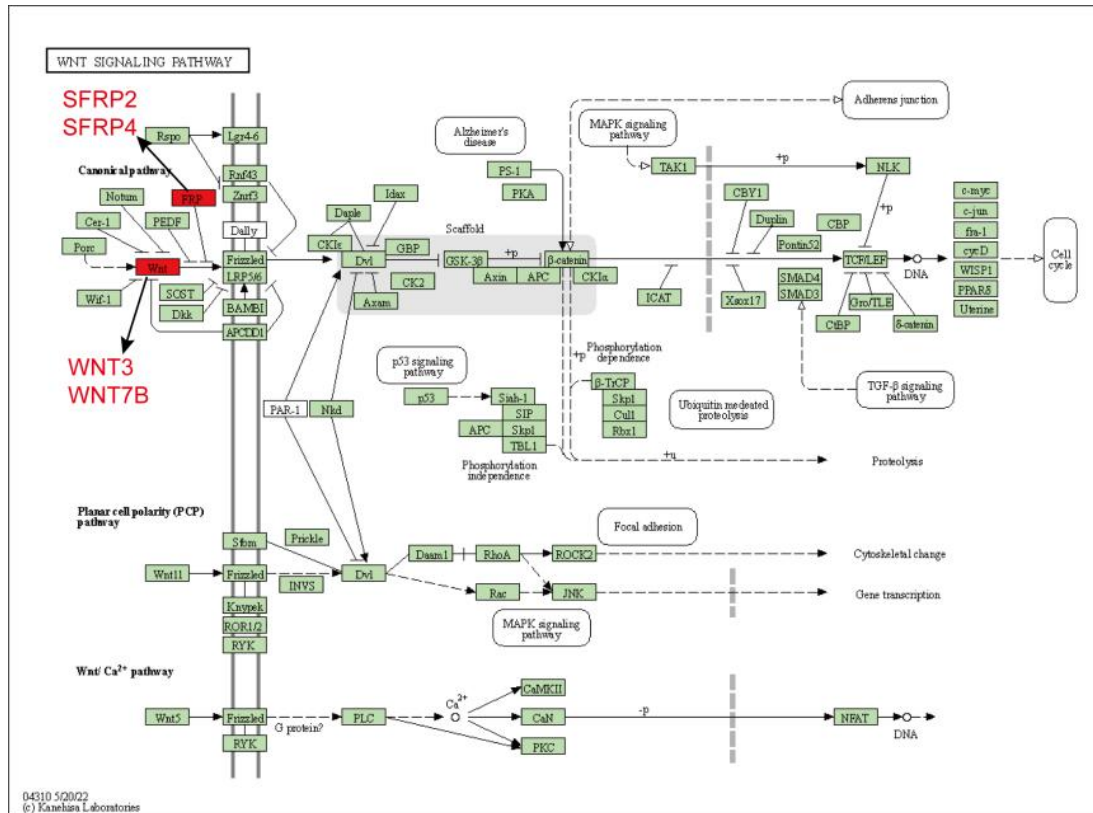

Supplementary Figure S1. KEGG pathway map for Wnt signaling pathway of DEGs.
