# Supplementary material for: Identification of Critical Genes for Ovine Horn Development Based on Transcriptome during the Embryonic Period
Source: Biology (Basel). 2023 Apr 13;12(4):591. doi: 10.3390/biology12040591 (PMC10136283; doi:10.3390/biology12040591)
Supplement: Supplementary file 1 [file biology-12-00591-s001.zip]

Archive with 6 entries (6 files):
- Supplementary Figure.pdf
- Table S1. Primer pairs of DEGs used for qRT-PCR validation.xlsx
- Table S2. The DEGs in horn bud and forehead skin tissues of fetal sheep.xlsx
- Table S3. Gene sets of horn-related genes and proteins from previous studies.xlsx
- Table S4. GO enrichment analysis of DEGs.xlsx
- Table S5. Top 5 hub genes of the protein-protein interaction network .xlsx
