# Supplementary material for: Identification of Critical Genes for Ovine Horn Development Based on Transcriptome during the Embryonic Period
Source: Biology (Basel). 2023 Apr 13;12(4):591. doi: 10.3390/biology12040591 (PMC10136283; doi:10.3390/biology12040591)
Supplement: Supplementary file 1 [file biology-12-00591-s001.zip › Table S1. Primer pairs of DEGs used for qRT-PCR validation.xlsx]

## Sheet: Sheet1
Table S1. Primer pairs of DEGs used for qRT-PCR validation.
Gene name	Primer sequence (5′-3′)
PGK1-F	TTCGCTTTGTCATTGTTTCACC
PGK1-R	ATCACCAACTTCATCTCCCTCC
RXFP2-F	GTATCAGAAGTACGCGCTGC
RXFP2-R	GTCTGCCATTTTCCAGGACG
SFRP2-F	AGAGTACCAGAACATGCGGC
SFRP2-R	CAGACGGGAGCAAAGAGTGA
SFRP4-F	CCAGGACAAGAAGCGAACAG
SFRP4-R	TCATGCTCGTTTGGGGTTTG
KRT1-F	CCAACTGAAGAGCGACCGAT
KRT1-R	TGGTGATGTAAGCAGCGTCC
KRT10-F	CCCTGGAAGCCTCCTTGG
KRT10-R	TCGGCATTCTGGCACTCG
WNT3-F	CTGCGACTCACATCACAAGG
WNT3-R	CCTGTTCTCACGTGCATCTG
