# Supplementary material for: Identification of Critical Genes for Ovine Horn Development Based on Transcriptome during the Embryonic Period
Source: Biology (Basel). 2023 Apr 13;12(4):591. doi: 10.3390/biology12040591 (PMC10136283; doi:10.3390/biology12040591)
Supplement: Supplementary file 1 [file biology-12-00591-s001.zip › Table S2. The DEGs in horn bud and forehead skin tissues of fetal sheep.xlsx]

## Sheet: Sheet1
Table S2. The DEGs in horn tissue and skin tissue of sheep
gene	baseMean	log2FoldChange	lfcSE	stat	pvalue	padj
RXFP2	1401.39	3.1842	0.366331	8.69215	3.56e-18	7.42e-14
SFRP4	11327.7	3.04715	0.407313	7.48108	7.37e-14	7.69e-10
SFRP2	18478.5	3.07769	0.418272	7.3581	1.87e-13	1.3e-09
ACAN	668.294	3.74797	0.517299	7.24526	4.32e-13	2.25e-09
FOXL2	117.839	3.09117	0.48449	6.38027	1.77e-10	7.38e-07
FMOD	8390.35	2.40937	0.399601	6.02942	1.65e-09	5.72e-06
LOC105603423	350.144	1.92964	0.340405	5.66866	1.44e-08	4.29e-05
LOC101121916	328.129	2.16003	0.398251	5.42378	5.84e-08	0.000152155
C25H10orf99	460.183	4.18011	0.777032	5.37959	7.47e-08	0.000173038
LOC114118900	27.1976	5.37267	1.01345	5.30139	1.15e-07	0.000239737
LYPD2	120.212	3.02957	0.575129	5.26763	1.38e-07	0.000262064
TMEM132E	332.076	2.4597	0.488886	5.03122	4.87e-07	0.00084719
KRT1	287535	3.31376	0.663775	4.99229	5.97e-07	0.000957445
FFAR4	583.831	2.20425	0.443264	4.97277	6.6e-07	0.000983437
PENK	476.551	3.35152	0.677612	4.94607	7.57e-07	0.00105313
ASIC1	114.454	4.11263	0.837116	4.91286	8.98e-07	0.00117024
TNN	135.864	2.34483	0.493898	4.74759	2.06e-06	0.0025259
KRT10	196874	2.89878	0.613839	4.72239	2.33e-06	0.00270128
TMPRSS11A	30.7611	7.43165	1.58039	4.7024	2.57e-06	0.00277087
CCER2	2153.94	2.50122	0.532659	4.69572	2.66e-06	0.00277087
ELFN1	375.855	1.97782	0.422541	4.68078	2.86e-06	0.00283877
JPH4	207.828	2.14622	0.46191	4.6464	3.38e-06	0.00320279
KRT24	278.386	3.33891	0.722312	4.62253	3.79e-06	0.00343809
LOC114113269	32.8084	-5.00679	1.1061	-4.52652	6e-06	0.00500327
SCG2	22.6957	3.99208	0.881062	4.53098	5.87e-06	0.00500327
CP	259.205	2.03441	0.451002	4.51087	6.46e-06	0.00517995
PRSS37	14.5598	7.32205	1.63159	4.48768	7.2e-06	0.005271
CFI	159.007	2.51308	0.560074	4.48704	7.22e-06	0.005271
OMG	33.5166	2.75612	0.614664	4.48394	7.33e-06	0.005271
JAKMIP2	108.821	2.92278	0.657668	4.44416	8.82e-06	0.00613532
IL36B	42.1291	4.92487	1.11588	4.41344	1.02e-05	0.00684619
PDZRN4	295.415	2.10715	0.480758	4.38297	1.17e-05	0.00763151
LOC114113300	11.5091	-6.98504	1.60105	-4.36277	1.28e-05	0.00804347
ALX1	422.3	1.86885	0.428806	4.35826	1.31e-05	0.00804347
SELP	761.106	1.49997	0.347634	4.31479	1.6e-05	0.00952132
PRSS22	1013.19	-1.543	0.362335	-4.2585	2.06e-05	0.0119251
COL8A1	4008.51	1.8288	0.432043	4.23292	2.31e-05	0.0130052
CFB	940.505	1.76577	0.421428	4.18996	2.79e-05	0.0153158
SERPINF2	463.067	1.74945	0.420841	4.15704	3.22e-05	0.0163707
TRARG1	68.8834	-3.64715	0.877575	-4.15594	3.24e-05	0.0163707
NELL1	121.675	2.57843	0.619899	4.15943	3.19e-05	0.0163707
PAGE4	30.6912	-3.71699	0.895233	-4.15198	3.3e-05	0.0163707
TCL1A	32.3644	-3.68785	0.890465	-4.14148	3.45e-05	0.0167397
TMEM59L	1644.68	2.60965	0.637175	4.09565	4.21e-05	0.0199583
MAP1LC3C	158.519	2.4358	0.597256	4.07833	4.54e-05	0.0210272
MAP6	149.468	2.47579	0.608977	4.06548	4.79e-05	0.0217366
LOC101104027	2514.79	-2.80049	0.693763	-4.03666	5.42e-05	0.0225785
NTNG2	130.654	2.1222	0.526282	4.03244	5.52e-05	0.0225785
CILP2	300.861	2.14692	0.531424	4.03994	5.35e-05	0.0225785
TMEM63C	115.102	2.46649	0.610719	4.03867	5.38e-05	0.0225785
DNAH5	128.746	2.88532	0.71339	4.04452	5.24e-05	0.0225785
ECM1	5433.45	2.46711	0.614356	4.01577	5.93e-05	0.0237593
SCUBE2	2184.68	1.37488	0.342744	4.01137	6.04e-05	0.0237593
LOC114113348	19.307	-4.84073	1.21556	-3.98232	6.82e-05	0.0258128
ARSI	501.379	1.93767	0.486951	3.97919	6.92e-05	0.0258128
ALDH3A1	422.772	2.72458	0.684794	3.97869	6.93e-05	0.0258128
WNT7B	258.899	1.70508	0.433233	3.93571	8.29e-05	0.0303566
C5H5orf46	530.441	2.77932	0.710325	3.91274	9.13e-05	0.0322635
C1QTNF3	7611.54	1.65713	0.423365	3.91419	9.07e-05	0.0322635
ANKRD31	110.642	-2.25187	0.578398	-3.89329	9.89e-05	0.0343821
PAX1	489.572	1.48711	0.383429	3.87845	0.000105124	0.0359489
LOC114114536	239.434	1.65068	0.428458	3.85259	0.000116874	0.0393226
LOC105604171	568.007	2.38777	0.620942	3.8454	0.000120356	0.0398513
ACSL6	303.18	-1.78884	0.468496	-3.81825	0.000134401	0.0438063
C1S	13217.7	1.8858	0.495429	3.8064	0.000141002	0.0452509
WNT3	3341.9	1.40359	0.369247	3.80122	0.000143983	0.0455075
DLX6	39.1017	2.34351	0.620076	3.77939	0.000157211	0.0489467
IL6	102.84	2.80936	0.744333	3.77433	0.000160435	0.0492158
