# Supplementary material for: Identification of Critical Genes for Ovine Horn Development Based on Transcriptome during the Embryonic Period
Source: Biology (Basel). 2023 Apr 13;12(4):591. doi: 10.3390/biology12040591 (PMC10136283; doi:10.3390/biology12040591)
Supplement: Supplementary file 1 [file biology-12-00591-s001.zip › Table S3. Gene sets of horn-related genes and proteins from previous studies.xlsx]

## Sheet: Sheet1
Table S3. Gene sets of horn-related genes and proteins from previous studies
Transcriptome	Proteome	Genome
TRHDE	TXNRD1	FOXL2
COL2A1	MYH11	PCSK5
SFRP2	CGREF1	HOXD3
FNDC1	TPM3	HOXD1
ITGA11	PPP1R13L	HOXD10
SFRP4	ARF4	HOXD9
LAMB4	ZNF326	HOXD8
EBF3	ITIH1	MEGF8
LUM	SCAMP2	TMEM45A
AEBP1	CBFB	EDAR
WIF1	ANXA5	ZSWIM6
RFTN1	BDH2	ADAR
MMP2	KERA	BMPR1B
ALX3	AEBP1	RXFP2
PRRX1	COPS4	NPR3
CYTL1	AP2S1	TCF4
RTN4RL2	GNAS	IBSP
APLNR	TNN	TNN
RTN4R	VCAN	BT.89732
DACT2	MVP	STMN2
MESP1	FKBP9	MMP13
BEST1	FN1	RTN1
PENK	SSR1	OSTN
ALX1	TGFBI	ANO5
ASPN	MYH10	BGLAP
MMP13	FKBP10	OMD
ITGB3	CALD1	LOR
LOX	ECI2	MMP9
HAPLN1	TPM1	PRSS35
EPDR1	LOC101104705	BT.78843
SPP1	MGP	SLC36A2
SATB2	THBS1	NSG2
EYA2	FERMT2	COL8A1
FBLN7	ACTA2	DDX3Y
MMP16	FBN1	DMP1
PALD1	DPT	BT.90609
VCAN	TPM2	BT.92700
RCN3	MAOA	ACTA1
COL11A2	PALLD	COL22A1
COL11A1	PARVA	PHOSPHO1
SERPINH1	PDLIM4	SMPD3
CD93	COL6A3	EEF1A2
SERPINE2	ITGAV	STMN4
ATP6V0D2	GYG1	MYLPF
PRRX2	GAL-1	CKM
ACAN	ALPL	NEUROD6
CDH11	COL5A2	TUBB4A
SIGLEC1	COL6A1	IGFBPL1
CPE	CTSK	MYL1
FOLR2	ACAN	SCG2
SGMS2	SEC23A	RPTN
LOC102175311	TNC	GAD1
CD300E	ALDH1L2	STMN3
KRT2	COL6A2	CILP2
WNT5B	IDH3A	SST
CTHRC1	PPM1F	GPM6A
KLK5	POSTN	RPL21
KLK8	HYI	ACTC1
COL5A1	FMOD	CHGB
COL1A2	NNT	GABRA5
PFDN4	BGN	KBTBD10
COL1A1	LOC443512	MYL7
LOC102172305	TGFB1I1	TNRC4
LOC102180291	RAD23B	DDC
COL12A1	COL12A1	SLC6A15
RPL37	PTX3	SPP2
SIGLEC15	GALK1	ISLR2
LOC102181045	CSN2	UNC45B
TNN	ADSS	MYBPC1
FKBP10	TTC37	ELAVL4
FAM109A	LOC101102969	PMP2
SCARA3	LOC101106199	PHEX
MRC2	LOC101110777	NRSN1
CLDN10	S100A12	JAKMIP1
PNOC	LOC101113302	DLX6
SLC37A2	COLGALT1	SLIT1
OLFML2B	S100A8	RPL23A
BGN	S100A9	AP3B2
NOG	HSPB8	MYO3A
PTH1R	SCCPDH	BAMBI
GPX7	GLRX5	SLC8A3
ANKRD33	GGCT	BAI3
P4HA1	GLRX	CSRP3
COL5A2	UFD1L	SLC17A6
GPR68	CRYAB	ATP1B4
BGLAP	PGLYRP1	SGMS2
DMP1	S100A2	ZIC2
OSTN	LOC101112657	INA
ADAM19	NOL3	PHYHIPL
GXYLT2	LGALS7	CRMP1
CCDC28B	KRT77	GRM3
RUNX2	CST6	SP7
MEGF10	BAC5	DPYSL5
PTX3	PRDX6	OLIG1
CKAP4	CATHL1A	MT3
EYA1	CA2	SEZ6L2
BAMBI	EIF3K	RHBDL2
MXRA8	TRADD	CXORF57
ARL4C	APOC3	CHAD
FOXC2	XPNPEP1	MYOZ2
MRPL57	NDUFA7	DYNC1I1
MDK	DSCAML1	INSC
FNDC10	EIF3L	DLX5
SDHAF1	MMP2	DES
SERPINF1	ATP6V1C1	DPYSL4
SIX2	LOC101109584	ST6GAL2
OSCAR	LASP1	CXHXorf64
FZD8	PDLIM7	KERA
SNX10	GLB1	TNNI2
ZFHX4	OLFML3	FABP4
TMEM253	ACLY	SMPX
FAM171A2	SERPINH1	PTN
GPR83	OMD	TMEFF2
OTX1	NAA15	RPRM
TFAP2C	CD9	CRCT1
KRT3	LETM1	ELAVL3
LPAR6	VASP	MYOM3
WNT4	ZYX	CNTNAP4
PLA2G4D	VTN	GAP43
THEM5	SEPT6	CCL14
ZNF774	PRKCSH	MGP
COL7A1	SPTBN1	ARHGAP36
BLK	STX12	ENO2
ENPP1	LSM2	NEUROD2
S1PR3	CDH13	FMOD
GP2	ARMC10	A2M
LRRC3	TXNL1	MYO16
IQCA1	LAMB2	PAX6
FAT3	CYB5R3	NTN1
BPIFA1	UBQLN2	OLIG2
LOC102174506	KANK2	HIST1H2AA
KRT36	GNB2	AQP4
FMOD	DPYSL2	SYT5
KRT10	SORBS3	DNER
PGF	RAB14	MAPK10
COL16A1	F13A1	CASQ2
ALOXE3	TAGLN	GFAP
C7H5orf46	LOC101109939	ASIP
KRT5	SPP2	FSTL3
KRT1	SERPINF1	ELAVL2
CEBPA	CLIC2	SNAP25
STEAP1	OLFML1	CAV3
MLANA	SPTLC1	ATP1A3
KRT14	ATG3	FRMD7
SNAI2	EIF4H	HAPLN1
KLK11	MFGE8	TBR1
THBS2	SOD3	MATN4
PCSK5	CD81	SLC13A5
ALX4	MYLK	RYR2
KRT84	DNAJB11	DCHS2
DMKN	LOC101119195	PLS1
LMO1	PTGIS	HPCAL4
LOC102184223	TIMM44	CHL1
LOC102184770	CHAD	PPP2R2B
LOC102185235	CAMK2G	GNA14
LOC102185363	LOC101104114	AK5
CLEC11A	S100A7	CUX2
CSTA	SBSN
GJB4	SPTB
ZNF469	TRA2B
DLX2	RTAP27-1
DLX4	LOC101111178
LOC102191570	LOC101115597
LOC106503395	BZW2
TBX1	PSPC1
MT4	KRT10
DIRAS2	KRT15
CD101	SPINK6
TNC	CSNK1A1
TNFRSF11A	PSORS1C2
PRR15	LGALS7B
ADAT3	LOC101106046
MEX3A	GAPDH
LOC102175959	CALML5
ADAMTS18	NCL
C1QTNF6	KRT84
PRKG2	DMKN
TPT1	TUBA4A
LOC102184534	NIT2
MARCKS	PTGES3
PTN	TACSTD2
TMPPE	GIPC1
GPX8	KRT36
AVIL	GID8
KCNJ3	YWHAZ
LOC108633189	EIF3A
SOX4	LOC101112255
CTXN1	AKAP12
MSLN	LOC101103862
CDC42EP1	RPLP1
LOC108633894	PPP2R2B
ARNT	SERPINB5
COL3A1	NDUFV2
PDGFRL	FGA
COL4A2	KRT1
FADS3
PARVA
LOC102173207
CCDC80
DGAT2
KERA
DDIT4
LGALS1
ADGRA2
NID1
GALNT5
ADAMTS16
VIM
MMP28
GSC
ASIC3
C28H10orf10
42804
CYGB
VWF
NID2
SOX18
SPARC
ADIPOR1
MMP9
LOC102168680
OMD
SMPD3
SLURP1
ZNF467
ISG15
HMGB2
PGAM1
SERPINA12
CCNF
LOC102174057
LOC102174322
LOC102174924
RPN1
LOC102175572
LOC102176024
ASPRV1
TRAIP
LOC102176721
CHAD
UBA7
RPS15
KLK15
MYH9
LOC102178051
NIPAL4
C3H1orf162
SLC25A37
MYO3A
KRT9
KLHL9
SERPINB1
FAM122A
BMP1
CPZ
SELPLG
WNT1
ADAMTS17
WDR86
TMEM203
SERPINB11
WISP1
SERPINB7
NDUFS6
IL36RN
CRABP1
GLRX
CHST11
DLX6
LOC102184990
NPRL3
OCSTAMP
SOST
HBM
MOB3A
TCIRG1
SPI1
PLAUR
CDCA4
SLC26A6
RCOR2
PSTPIP1
ALPL
S100A11
MEMO1
INSC
TP53I11
PHOSPHO1
SLC36A2
SP7
COL13A1
LOC106501763
TADA2B
BLOC1S4
F2RL3
ZFP36L2
TUBA1C
SEZ6
SHC2
MAP6
KIAA1024
LOC102172074
NXPH2
C15H11orf87
CPT1C
GNB5
SCD5
CPNE4
DGKI
DCSTAMP
NRXN1
TENM4
SLC8A3
PORCN
GSG1L
NCAM1
SLC9A5
MAB21L1
DBX2
MEIS3
PLPPR5
CARMIL3
CNTN2
OTOF
TMEM151B
SRRM3
NAV3
LRFN1
DPP6
ECE2
PAX3
MEST
WISP2
SAMD14
PTPRZ1
LOC102179574
NELL1
FBXO41
SLC1A6
NTM
CACNA1G
ATP6V1G2
OLFM1
ASIC1
MGAT5B
LRFN5
SYNDIG1L
ACAP3
LOC102190950
SLC6A15
ZIC2
PRRT2
SYN2
SPRN
KBTBD11
FAM19A5
PGLYRP3
GSDMC
WFDC5
WNT10A
DUOX1
NCCRP1
DUOXA1
COL17A1
EPS8L1
S100A16
ANO2
HEY2
CDH2
CMKLR1
CDX1
OTOP3
ANO5
MSMB
LOC102188566
MS4A10
KCNJ1
TMEM213
BICC1
MMP7
GPNMB
LOXL4
WNT7B
LOC102178921
TMTC1
TCN2
ALB
VTN
IGF2
HSD3B7
XPC
C8A
SEPHS2
ITIH2
APOC4
GLUD1
FAM89A
ARL4D
AMBP
LOC102177672
LOC102177879
LOC102180655
RCL1
LOC102182294
HGFAC
SDC2
LOC102188072
SLCO2B1
SEC14L3
SLC25A13
LOC102191021
LPO
NME9
SERPINE1
LOXL3
MMP12
MSR1
CDHR3
TMEM212
PDPN
VMO1
CDHR4
LOC102180465
LHB
HTRA4
COL22A1
BPIFB1
CCDC78
COL24A1
ODF3B
ITPRIPL2
TEAD4
FHL3
PKM
NOL3
PADI2
SOWAHC
IL19
LOC102176997
LIPN
CSN2
KRT26
OVOL1
KRT25
KRTAP11-1
LOC100861381
KRT27
TYRP1
LOC102168573
BNC1
PNPLA5
DCT
LOC102170546
ABCC4
HR
MMP27
PLB1
IFFO2
LOC102171473
PADI3
RNF39
LOC102172204
SLC35D3
DNASE1L2
POSTN
CHAC1
RDH12
NDE1
LOC102173866
GPRC5D
FAM167A
HEPHL1
LOC102174897
LOC102175216
KRT35
ABCC11
FA2H
PSAPL1
KREMEN2
SFRP1
PMEL
GLYATL2
LOC102176726
LOC102177231
VDR
EFNA3
F3
HOXC13
ACER1
KLK9
TRPV3
LOC102179328
FAM46B
ATP1A3
LGALS7
TGM7
LOC102180231
LY6G6D
FABP9
TRPV6
LOC102180889
PAPLN
EDN2
MC5R
SBSN
TSPAN10
EFS
IL1F10
LOC102182197
TYR
VANGL2
LOC102182669
CXCL14
TRPM1
DSG4
RAB38
DSC1
KRT82
FAM83B
FOXI3
TP73
ISM1
LOC102184404
SDR9C7
DSC3
LOC102185156
GSDMA
LOC102185436
ACTBL2
CDSN
GJB3
FAR2
POU2F3
FLRT3
LOC102186976
DLX1
LOC102187233
FOXN1
LOC102187582
CEACAM19
TGM6
TCHH
AHNAK2
DLX3
PNPLA1
ELOVL3
BPIFC
LIPK
S100A3
LIPM
TP63
MSX1
LOC102190903
WNT16
TNFRSF18
EGR3
PLK3
LMX1B
LOC106503216
FOXC1
LOC108633223
NPW
LOC108636550
LOC108637536
LOC108638300
IRX4
AIF1
CSF1R
FCER2
ZBED2
KAZALD1
DNASE2
LOC102184252
RUFY4
TOMM20
LOC102168445
SCP2D1
PLAC8L1
TNFRSF4
EFCAB3
LRRC46
INTS5
ADM5
PAQR7
C19H17orf97
LOC102173987
STYXL1
GTF2A1L
LOC102175108
CMTM2
TOPAZ1
PRSS37
PRMT8
LOC102179878
LOC102181148
PLEKHG4
ZC2HC1B
C25H7orf61
LOC102182474
TCF23
CATSPER2
CABP2
LOC102184291
C9H6orf58
C8H9orf24
PRSS50
TKTL2
LOC102185944
PIWIL4
ZAN
LOC102189116
LOC102189601
LOC102189675
COMP
KIF17
MAEL
WDR93
MYPOP
C10H14orf37
ACPT
TTLL8
MEX3B
GSG1
GGN
LOC101116302
UBALD2
FLRT2
LOC101118649
LOC106990434
LOC101118825
LOC101112330
ZMYND11
TMEM200B
LOC105610454
SOD1
NFIL3
ARF6
ARRDC3
LDOC1
CHMP1B
PLAC9
SEL1L
LOC101109397
LOC105616617
LOC101113072
LOC101110701
SETD5
LOC105615745
STBD1
HSPA1A
KIRREL
EGR1
HSF2
LOC101118703
SRGN
TMEM263
ARL6IP1
LOC105606136
ARID4B
V15
LOC101121910
CDON
ZNF260
EMC6
LOC101117678
LOC101106558
PLEKHF1
LOC105613289
CILP
LOC101111090
LOC101120934
IGF2R
SLC25A34
ADAMTS12
PRR9
LOC101110427
ZC3H11A
USP22
OSBPL1A
FRAT2
CHMP2B
MTMR1
PRELP
CRISPLD2
KIF3B
LOC101107349
OSBPL8
PITPNM3
FAM91A1
LOC106990106
KRT74
CTSO
CSF2RB
GADD45GIP1
LOC105605372
TMEM186
KIAA0430
GPR107
CREB3L2
LMTK2
CMTM6
LOC101116882
FAM234B
LOC101120236
KRT72
ARHGAP29
CCPG1
LOC106991922
LOC106990908
CFAP97
LOC105616742
LOC101112542
KREMEN1
C5AR1
TSHZ3
TENM3
FAM135A
LOC105616285
PKP1
XYLT1
ZCCHC14
LOC105602314
PTP4A1
PYURF
TNS1
TMEM131
ANKRD11
LOC105604827
SMNDC1
FOXO3
CHTF8
EPN2
S100A10
LOC101111166
PLPP3
LOC101107080
ZNF22
RBM15B
CEP85
MFSD11
JOSD1
NDRG1
NOD2
ADRA2B
TRPM7
LOC100526782
KRT28
TIGD2
ADAMTSL3
LOC101107617
MRPS34
ZZZ3
PIGM
DDR2
C8H6orf120
LOC101113496
GALNT7
FAM213B
LARP1
LOC101108035
LOC105603814
DLG1
SELE
LOC105610446
LOC105612255
ESYT3
WBSCR27
SMARCC1
ABR
SREK1IP1
LOC101117269
TIMP3
LOC101110922
LOC105615225
TRAM2
HSPB2
RANBP10
PPP6R3
ACTR1A
NFKBIZ
MLLT4
LOC105602670
LOC101108789
SLC36A1
LOC101120850
C1S
KRT2.11
PIM1
BIIIB4
LOC101117063
ARHGAP35
TMEM63A
LOC105604997
RNF144A
TAF2
LIMD1
KRT34
ZNF655
LOC101115486
TGFBR2
RPP25
LOC106991648
ZMIZ1
SKP2
PTPN21
MAP3K7
PITX1
LOC105616788
ITGA4
NNAT
PODXL
LOC101118133
NDNF
LOC106990437
MYO18A
ERC1
LOC106990559
GZF1
LARP4B
PVRL1
ACAP2
KCTD10
ITGAM
RBP1
LOC106991168
SNX21
LOC106990801
LOC101102178
TATDN2
PABPC4L
FRMD6
MRCL3
LOC105605741
OVOL2
POM121C
LOC101106728
GALNT2
ESRP1
NDUFB10
SELL
ELL2
RAB11FIP1
C13H20orf194
NR1D2
MAN1A1
YEATS2
TMOD1
LOC101110828
ADCY3
SLU7
PXN
KIAA0232
PSMD10
LOC101104859
LOC105615158
MAP6D1
LOC101111915
ABI3BP
MFN1
SIM1
LOC101104306
LOC101104153
PPP2R2A
ATXN7
LOC101113206
LOC105614885
LOC105609630
SDC1
TULP4
SAMD4B
CHGA
EML1
SPTAN1
LOC106990985
DHCR24
LOC105605794
B4GALT1
SERPINF2
UPF1
CLEC16A
VKORC1
ANKRD50
ST3GAL1
AK8
EAF1
LOC101112946
TMED7
CBR3
AK1
LOC105608584
GALNT10
APP
FSTL3
EXOC6B
LOC101103772
ECHDC1
SCNN1A
STAT3
KLF4
LOC101111946
LOC101102895
LOC101105379
LOC106991405
CARF
LOC105611786
EFR3B
LOC105606063
EIF3F
APC
RPA1
LOC106991655
KIAA0513
GPT2
ACOT13
PRKACA
ARHGAP23
CPNE1
ARRDC4
C20H6orf132
MYO1D
LOC105614874
LOC101104237
KIAA0355
C25H1orf198
LOC106991258
NCKAP1
SLC9A9
WAC
AQP8
LOC106991051
TUB
LGALSL
LOC105611679
BHLHE40
TBC1D14
MAML1
STX19
NAA40
IL2RB
LPL
LURAP1
EVA1B
LOC101102824
LOC105609153
FBXL22
LOC101122261
CX3CL1
DAGLA
LOC105604883
RFFL
ZC3H4
BAHCC1
DDX21
CAMKK2
LOC105602404
RPL36AL
IQSEC2
LOC101105425
METTL16
CACNA1A
CRISP3
CITED1
TMUB2
ERAP2
CLDN1
EPC2
NKIRAS1
LOC101118647
SLC25A30
SLC9A3
TCTEX1D2
PPP1R1A
RHOBTB2
CABIN1
LOC105609918
GNG5
NAP1L5
LOC101119765
MADD
GLIS1
TRPM2
UBXN2B
RAPGEFL1
ARAP2
CISD3
COL15A1
CDKL5
IQGAP3
AMOTL1
EPAS1
RSPH14
NPTXR
PLEKHA6
ZSWIM4
LOC101117289
TARDBP
HRH2
PAPPA
LOC101121333
GLI3
FAT4
VPS53
TIMM8A
NAA60
LOC101123159
LOC106991667
MAPK1
CNNM4
SCN9A
MASP1
HOXB3
RXFP2
ATP10D
MED20
ATP6V1D
LOC101106534
ELAVL1
PGAM2
PPP4R3A
HNRNPUL1
SUMO1
MAP4
SLC7A5
LOC101116579
BRF2
PANK1
SMIM24
LOC105611737
ANKRD52
CLSTN2
HK2
LAMTOR2
LOC101104203
RNF44
ZNF608
LOC101111903
CD24
LOC101102714
LOC101121216
LOC101120606
LOC101110351
LRRC58
SHROOM4
NRDE2
PTPRK
ZNF185
RARRES2
LOC105615270
FAM53B
SLC5A1
STON2
PACSIN1
LOC105606095
STK24
CDKN1C
C15H11orf42
ARHGEF4
LOC105603277
SDC3
GYG1
SMIM11A
ZNF207
SH3KBP1
LOC105611038
DLK1
ZNF583
LOC105602904
STK38L
TFE3
GPR108
LOC105604649
LOC101112657
BIN1
LOC101113159
LOC105609737
QTRTD1
SNX2
PEG3
LOC105606074
CCNK
CPNE5
UBE2T
EFNA4
ATP8B1
LOC101122262
WIPF2
LOC105608129
TMEM109
LACC1
LOC101117946
TNFSF10
HSD11B2
GRIK3
LOC105605970
LOC101116068
LOC105607198
LOC101104456
LOC101109951
RAPGEF1
LOC101118752
GAN
PIGC
LOC101117414
IQSEC1
LOC105605515
LOC105604834
KHK
LOC105608416
LOC105603608
NHLRC3
LOC101112474
SYNE3
SIPA1L3
LOC105614873
PTK2B
RPL30
SPEN
ARHGAP1
TMEM126A
ANKS1A
PRKRIR
LOC101107430
FLT1
VEGFA
KCNG2
LEPR
FAT1
ELMSAN1
SLC25A44
CD74
MSX2
LOC101105437
LOC105605313
KCTD2
EMC9
PUM2
EEF1D
LOC106990995
COX5A
KLF3
LOC106991767
PPARD
SRGAP2
SH2B3
CHP1
FNDC8
C24H16orf72
LOC101114261
SLC35F6
HES6
LOC101107036
LOC105607154
TLR1
KDM6B
FURIN
LOC105614324
LOC101118100
LOC105606122
LOC105605744
NKAIN1
LOC105606039
CMC1
HOMEZ
CCDC154
HSPB6
LOC106990212
LOC105604740
KRT18
GPX3
MGLL
EFNB1
ABHD5
LOC105605723
ANKH
LOC101107089
STK4
ATP8B2
TTC28
LOC105605995
LOC101117894
ARHGAP27
TUBGCP3
MATN4
SPEF1
LOC106991688
TRMT13
RAB3GAP1
CASP7
DENND2A
XDH
PTPN14
CALD1
ADARB1
MIA3
FHDC1
ATP2B1
MRC1
LOC101121302
LOC105614727
GRHL3
MAF
GLG1
KIF3C
LOC106991113
ARHGEF18
DOT1L
RALGAPA1
FZD7
SLC39A5
LOC101118085
LOC101112891
YWHAG
UGGT1
ZNF217
KPNA5
LOC105608797
EIF4EBP3
TPRN
PTPRC
UBQLN1
LOC101113750
LOC101123133
DFNA5
KIAA1841
VAV2
PER1
SCG5
SMAD4
HJURP
MCC
LOC105605699
PIK3R1
DYNC1LI2
LOC106991857
HCFC1
LOC105604844
SMIM15
PLPP2
LOC101112306
TDRD12
ZNF175
NECAB3
LOC101113086
EPHA2
LOC105606135
LOC105608537
NF2
LOC101118156
UBE2J2
SNX29
DENND4A
SDHC
LOC105610091
LOC105612436
LOC101105256
COL6A6
PRPF4B
FEM1B
LOC101108797
C7
SHROOM2
REEP6
CLASP2
TRIM23
NRIP1
PHYHIP
PAPPA2
ZNF280B
PFN2
LOC101123196
LOC105602054
GORAB
CXCR4
PEMT
CAMSAP1
NUDT15
PCDH10
LOC105602403
DNAJC30
CX3CR1
LOC101122718
DSP
TFPI2
STAT5A
LOC101108870
PRRC2B
USP53
BBS1
DIDO1
LPCAT2
IL36B
BNIP3L
LOC106991180
MRPL28
RALGAPA2
NLGN2
PFAS
ACACB
ZER1
YBEY
PLEKHG1
CHCHD5
IL1RAP
MRPS12
STRN
NUDT2
HIF1AN
BNIPL
ARSB
LOC101115773
LOC105605931
MMAB
TOM1L2
BCAP31
BOLA2B
KIF1A
CCDC142
KCNJ12
NDUFS4
LOC106991653
MICU3
B4GALT5
SSSCA1
C21H11orf95
DAB2IP
NFE2L1
ROBO1
SULF1
LYZ
TNNI2
CDC25A
MB21D1
LOC101116076
PFKFB3
TNFRSF1A
SCD
C1QB
WNK1
FAM155B
ZNF575
LOC106991214
ZFP30
CDKN2AIPNL
LOC106991402
BAC5
LYG2
GNA11
BMPR2
ZNF516
ZNF395
SEMA3G
SORCS2
LOC105606113
LOC105606137
LOC105607702
LOC101105823
CEMIP
UBE2Z
LOC105606593
LOC101117099
RPL12
FAM195A
A3GALT2
SUCLA2
FBXO30
MAK16
DQA
TSR3
CAMTA2
LOC106991561
U2AF1
MAGI2
CTSS
LOC101106648
FTSJ1
AEN
ARHGEF7
STAT5B
POLK
LRRC14
PCDH7
SUSD2
RBFOX2
C1H1orf228
NDUFS5
HIPK4
LOC101114610
LOC105606943
CCND1
FER1L5
TNK2
TMEM43
NAV2
LOC105605650
LOC101106314
USP32
NINJ2
ASF1A
SLC30A7
LOC101117231
PPP1CC
C20H6orf62
LOC105615321
ODF2
KIAA0226L
ZNF34
ARL14EPL
FLNB
IER5L
SLC44A2
SF3B5
COQ4
LOC101110545
UNC5B
MRPL11
PTK6
SLC35B4
TMEM261
CHL1
LAMB3
NDUFB2
OTOP2
TNFAIP1
RASGRP2
PTMA
APRT
PDE3A
SIN3B
LOC101123578
LRRC32
KIAA0930
PTOV1
SELP
FAM178B
LOC106991605
RARG
NFKBIL1
UBN1
KRTAP1-1
CCSAP
HOXB2
LOC101103862
LOC105610561
ZBED4
DSCR3
FAM172A
BCOR
RXRG
SUSD6
LOC101116750
MINOS1
LOC101102610
LYRM4
LYRM7
C2H8orf58
LOC101112843
LOC101118433
SLC27A5
ZNF276
PGLYRP1
UNC5D
PRDM5
COMTD1
CAV1
LOC106991709
RBM27
WNT5A
PSMG3
BID
ATP7A
ITGAL
LOC101109851
GALNT14
LOC105605661
NDUFA7
LOC105603421
FILIP1L
LOC106991992
GIPC3
LRRC8A
LPIN1
PDE5A
ABCA2
DENND5B
NOXA1
LOC101113055
IL18BP
C5H19orf60
FOXK1
VWA8
SPINK7
BCL7C
BRD1
NOX5
LOC105615744
CEP135
LOC105603529
FREM2
SPSB1
CASP8
GSDMB
LOC101121949
LOC101109351
NDUFC2
DKKL1
PDHA1
HDAC4
LYPD3
RHCG
MPP2
PLEKHJ1
LDB1
LOC101122341
PREX1
JAGN1
CDO1
RASSF2
LOC101119721
CYB5A
TCAP
RPL32
LOC100037664
PHLPP1
WNT6
EHD3
MFAP2
LOC101113831
TPPP
LOC101103097
FRMD4A
RAB1A
LOC105606290
RBM47
LOC101108031
LOC101120395
MRPS26
ZFP62
CYTH3
CDC42EP3
LOC101116002
LOC106990135
LOC101111911
LOC105604543
BHLHE22
TPM2
LOC106991949
KIF21B
KRT40
LOC101112304
LOC101102711
K33
FAM3A
CECR2
SPOPL
LOC101113420
GALNT8
CALML4
LOC101106855
LOC105604630
MACC1
CITED4
LOC105605852
LOC105605480
LOC105604272
LOC101103595
ARID3A
HLF
LOC105603009
EXOSC4
TMEM14A
SLC43A2
ATP2A3
PDE8B
RPL9
ZSWIM6
DHX33
IRF1
PCM1
CAPRIN1
KLHL21
TCTA
ABLIM1
LOC105604040
MEAF6
PDDC1
PPP1R10
FREM1
TMEM184B
FOSL2
LOC101118130
AQP1
PLEKHD1
GORASP1
KIF13B
KLHL26
43351
ARL8B
KIAA0556
WRAP53
MIA
LOC105610139
PLEKHG3
TCF7
LOC101109388
LOC101111245
DPP9
LOC105602022
CMTM5
SLC25A4
LOC101105651
BMPR1B
ICE1
BRI3
NKD1
LOC105601953
LOC106991439
LCMT1
RRAGC
LOC105616738
SLC9A1
LOC105606081
ARNTL2
LOC101122211
MYO1C
LOC101111893
MYO9A
MLXIP
MRPS28
LOC101105444
SDR42E1
GRAMD3
S1PR5
IRF8
KLHL25
LOC101112639
EXD2
IGSF3
LOC105611645
TTC22
LOC101103156
RPL36
LOC105605174
PTGES3L
LOC101121024
USF1
KRT8
LOC101105937
SYNJ2
RAB8A
PTGES3
NUDT16L1
SMAD7
LOC101107030
LOC105607805
CHODL
SSNA1
FAM229A
LOC101104062
LOC101113965
GPIHBP1
FDX1L
ZNF521
ANKRD61
PAQR5
LOC105615925
LOC105602480
PGLS
LOC101112832
LOC101122577
ZBTB7A
INPP4A
PRKX
LOC101115820
RPS17
GFRA4
TMED8
C7H14orf166
UBN2
LOC101107908
TMEM245
LOC105603670
FZD9
PET117
PLPPR3
ZNF668
LOC106990854
LOC101112122
HIF3A
VPS37B
LOC105609054
TIMM9
PNKD
PDGFRB
HGF
ST6GAL1
LOC106991067
AHSP
ZC3HAV1L
GRAMD4
LOC101123118
NFIB
LOC105611998
TMEM116
SF1
TTC26
HABP2
FBXL3
ATP5I
TIMM10
WAPL
SIVA1
LOC101108463
LPCAT1
LOC101111063
WLS
TST
WASF2
SETD1B
HS3ST3A1
IL17RA
LOC101106199
HMHA1
SLC7A8
CAPN14
ARL2BP
EFNA5
PIWIL3
RPS3A
TMEM231
LOC101118057
BCAN
LOC101105609
TMEM201
ZNHIT1
CDK14
SERPINB12
LOC106990520
LOC105605770
ADAL
HPSE
RNF216
MS4A8
LOC105606921
CD2
REL
K38
WNT3
PLCH2
NHP2
LOC101121371
LOC443297
TMEM94
RGSL1
ZAR1L
LOC105605360
LOC101103616
LOC106991533
TRIM71
LSMEM1
LOC106991181
SEPN1
PET100
LOC105606221
FAM212A
SHC1
PHKG1
RSPO4
TAMM41
PLA2R1
CELF1
ABL2
ATG16L1
ARL6IP4
HYPK
FAM168A
FAM83H
SMG7
RPS27A
MX2
NT5M
ADAM11
BBX
LOC105605079
LOC101109747
LOC105602425
MYEF2
ARL4A
CTSK
LOC105616454
IRF2BPL
PLA2G2F
CATHL1B
LOC101123128
ANOS1
LOC105605616
LOC105602913
EPG5
LOC105611588
DOCK5
LOC101116286
EIF4A2
DMAP1
PAG1
NUDCD2
CFH
CCDC186
PSIP1
PHF19
SQSTM1
LOC101107153
RPS13
LOC105602857
KDM4B
LOC101111335
LOC105602028
TNNT3
TGIF2
CHMP2A
TM6SF1
DAPK3
LOC106991502
ZNF770
CCNJ
LOC105614853
SCIN
PSMG4
KCTD5
ZMYM2
SCG3
CAMKK1
LOC101104627
NPDC1
TAGLN3
TMA16
KRT32
CABP5
USP54
LOC101117035
LOC101122906
DAGLB
LOC105614865
ATOH8
LOC106991429
RRP7A
EXOG
LOC101108955
FCGR3A
LOC101112800
FITM1
TOR1AIP1
TMEM115
LOC105616153
LOC101121908
FOXA1
NFATC2
SCIMP
LOC101116603
GTL2
LOC105616228
LOC106991908
ALOX15B
TMEM88
LOC101123419
LMNTD2
TSPAN2
LOC101110916
NCBP3
LOC101108961
RPS16
KCNMA1
ITPKB
PEG10
EIF2AK2
AR
LOC101111266
BPTF
LOC101116085
GATAD2B
LOC101111229
GALK1
MIOX
ZBED6CL
HSPG2
LRP1
ZBTB44
LOC101120029
SPC24
RALB
LOC101114287
TLR4
LOC106990876
COPRS
UBL4A
MYZAP
KIAA1147
BCL11B
SH3BGRL
DNAH14
LOC101115927
LOC101121036
ZRANB1
CHCHD10
DLC1
LOC101106975
LRCH1
CD79B
ERCC1
AP2S1
SRF
KRTAP5.4
VIPR1
LOC101119878
LOC105607745
LOC105609947
ALDH1L2
LOC101106702
EDF1
LOC101107405
LOC101108953
TRIM8
LOC105603314
LOC105604364
HSPA12A
IZUMO4
LOC101106046
GADD45B
C12H1orf74
ABHD18
USP45
LOC105605844
PDRG1
LOC106990353
DNMT3A
HERC6
LOC101103133
FDXR
LOC443259
PARPBP
RPL7A
ADD1
NEUROG2
FADS2
VSTM4
LOC105603914
UMAD1
TAF13
IGDCC3
SERPINB13
LOC101121646
LOC101108147
MRPL52
LOC106991034
ABCA12
CENPV
C12H1orf116
GALNT13
NCKAP1L
LRRC17
NAA15
SNCG
ZNF654
TMEM18
LOC105609749
LOC101104808
SIAE
HSPA5
FABP3
LOC106991941
LOC101121192
LOC105616615
CCDC167
ZNF512B
IKBKG
RSAD2
EFNB3
MRPL36
LOC101115634
LOC105605252
PPM1E
LOC106991377
SOX8
MCAM
LOC101109170
LOC105611277
LOC105613234
IL17B
NTN1
OGFRL1
SPIN1
SFMBT2
ACVR2A
BANK1
LOC105615980
LOC105604604
RIC3
TERF2IP
BLVRB
LOC105612469
[truncated: 1,466 more rows]
