# Supplementary material for: Identification of Critical Genes for Ovine Horn Development Based on Transcriptome during the Embryonic Period
Source: Biology (Basel). 2023 Apr 13;12(4):591. doi: 10.3390/biology12040591 (PMC10136283; doi:10.3390/biology12040591)
Supplement: Supplementary file 1 [file biology-12-00591-s001.zip › Table S4. GO enrichment analysis of DEGs.xlsx]

## Sheet: Sheet1
Table S4. GO enrichment analysis of DEGs
source	term_name	term_id	adjusted_p_value	negative_log10_of_adjusted_p_value	term_size	query_size	intersection_size	effective_domain_size	intersections
GO:CC	extracellular region	GO:0005576	1.74e-25	24.7588	4302	57	36	61806	SFRP4,SFRP2,ACAN,FMOD,LYPD2,KRT1,PENK,TNN,KRT10,TMPRSS11A,CCER2,ELFN1,KRT24,SCG2,CP,PRSS37,CFI,IL36B,SELP,PRSS22,COL8A1,CFB,SERPINF2,NELL1,NTNG2,CILP2,DNAH5,ECM1,SCUBE2,ARSI,ALDH3A1,WNT7B,C1QTNF3,C1S,WNT3,IL6
GO:CC	cellular anatomical entity	GO:0110165	1.59e-22	21.8	21550	57	56	61806	RXFP2,SFRP4,SFRP2,ACAN,FOXL2,FMOD,LYPD2,TMEM132E,KRT1,FFAR4,PENK,ASIC1,TNN,KRT10,TMPRSS11A,CCER2,ELFN1,JPH4,KRT24,SCG2,CP,PRSS37,CFI,OMG,JAKMIP2,IL36B,ALX1,SELP,PRSS22,COL8A1,CFB,SERPINF2,TRARG1,NELL1,PAGE4,TCL1A,TMEM59L,MAP1LC3C,MAP6,NTNG2,CILP2,TMEM63C,DNAH5,ECM1,SCUBE2,ARSI,ALDH3A1,WNT7B,C1QTNF3,ANKRD31,PAX1,ACSL6,C1S,WNT3,DLX6,IL6
GO:MF	protein binding	GO:0005515	8.12e-17	16.0903	14832	57	46	61806	RXFP2,SFRP4,SFRP2,ACAN,FOXL2,FMOD,LYPD2,KRT1,FFAR4,PENK,ASIC1,TNN,KRT10,ELFN1,JPH4,KRT24,SCG2,CP,CFI,OMG,JAKMIP2,IL36B,PDZRN4,ALX1,SELP,COL8A1,CFB,SERPINF2,NELL1,PAGE4,TCL1A,MAP1LC3C,MAP6,NTNG2,DNAH5,ECM1,SCUBE2,ARSI,ALDH3A1,WNT7B,C1QTNF3,ANKRD31,ACSL6,C1S,WNT3,IL6
GO:CC	extracellular space	GO:0005615	5.54e-16	15.2565	3368	57	26	61806	SFRP4,SFRP2,FMOD,KRT1,TNN,KRT10,ELFN1,KRT24,SCG2,CP,CFI,IL36B,SELP,PRSS22,COL8A1,CFB,SERPINF2,CILP2,ECM1,SCUBE2,ALDH3A1,WNT7B,C1QTNF3,C1S,WNT3,IL6
GO:BP	multicellular organismal process	GO:0032501	2.59e-15	14.5867	7463	57	35	61806	RXFP2,SFRP4,SFRP2,ACAN,FOXL2,TMEM132E,KRT1,FFAR4,PENK,ASIC1,TNN,JPH4,SCG2,PRSS37,OMG,IL36B,ALX1,SELP,COL8A1,SERPINF2,NELL1,TMEM59L,MAP6,NTNG2,TMEM63C,DNAH5,ECM1,SCUBE2,WNT7B,C1QTNF3,PAX1,ACSL6,WNT3,DLX6,IL6
GO:MF	binding	GO:0005488	4.84e-15	14.3149	18303	57	48	61806	RXFP2,SFRP4,SFRP2,ACAN,FOXL2,FMOD,LYPD2,KRT1,FFAR4,PENK,ASIC1,TNN,KRT10,ELFN1,JPH4,KRT24,SCG2,CP,CFI,OMG,JAKMIP2,IL36B,PDZRN4,ALX1,SELP,COL8A1,CFB,SERPINF2,NELL1,PAGE4,TCL1A,MAP1LC3C,MAP6,NTNG2,DNAH5,ECM1,SCUBE2,ARSI,ALDH3A1,WNT7B,C1QTNF3,ANKRD31,PAX1,ACSL6,C1S,WNT3,DLX6,IL6
GO:CC	endomembrane system	GO:0012505	1.62e-14	13.79	4733	57	28	61806	ACAN,FMOD,KRT1,FFAR4,PENK,ASIC1,JPH4,SCG2,CP,PRSS37,JAKMIP2,ALX1,SELP,COL8A1,SERPINF2,TRARG1,NELL1,TCL1A,TMEM59L,MAP1LC3C,MAP6,ECM1,ARSI,ALDH3A1,WNT7B,ACSL6,WNT3,IL6
GO:BP	system development	GO:0048731	1.83e-14	13.7381	4369	57	28	61806	RXFP2,SFRP4,SFRP2,ACAN,FOXL2,TMEM132E,KRT1,PENK,TNN,SCG2,OMG,IL36B,ALX1,COL8A1,SERPINF2,NELL1,TMEM59L,MAP6,NTNG2,DNAH5,ECM1,SCUBE2,WNT7B,PAX1,ACSL6,WNT3,DLX6,IL6
GO:BP	positive regulation of biological process	GO:0048518	2.23e-14	13.6512	6309	57	32	61806	SFRP4,SFRP2,FOXL2,KRT1,FFAR4,PENK,TNN,KRT10,SCG2,PRSS37,CFI,IL36B,ALX1,SELP,PRSS22,COL8A1,CFB,SERPINF2,NELL1,PAGE4,TCL1A,MAP6,ECM1,SCUBE2,WNT7B,C1QTNF3,ANKRD31,PAX1,C1S,WNT3,DLX6,IL6
GO:BP	cell differentiation	GO:0030154	1.18e-13	12.9279	4256	57	27	61806	SFRP4,SFRP2,ACAN,FOXL2,TMEM132E,KRT1,FFAR4,PENK,TNN,KRT10,OMG,IL36B,ALX1,COL8A1,SERPINF2,NELL1,MAP6,NTNG2,ECM1,SCUBE2,WNT7B,C1QTNF3,PAX1,ACSL6,WNT3,DLX6,IL6
GO:BP	cellular developmental process	GO:0048869	1.36e-13	12.867	4280	57	27	61806	SFRP4,SFRP2,ACAN,FOXL2,TMEM132E,KRT1,FFAR4,PENK,TNN,KRT10,OMG,IL36B,ALX1,COL8A1,SERPINF2,NELL1,MAP6,NTNG2,ECM1,SCUBE2,WNT7B,C1QTNF3,PAX1,ACSL6,WNT3,DLX6,IL6
GO:BP	multicellular organism development	GO:0007275	2.35e-13	12.6284	4823	57	28	61806	RXFP2,SFRP4,SFRP2,ACAN,FOXL2,TMEM132E,KRT1,PENK,TNN,SCG2,OMG,IL36B,ALX1,COL8A1,SERPINF2,NELL1,TMEM59L,MAP6,NTNG2,DNAH5,ECM1,SCUBE2,WNT7B,PAX1,ACSL6,WNT3,DLX6,IL6
GO:BP	developmental process	GO:0032502	4.07e-13	12.3906	6424	57	31	61806	RXFP2,SFRP4,SFRP2,ACAN,FOXL2,TMEM132E,KRT1,FFAR4,PENK,TNN,KRT10,SCG2,OMG,IL36B,ALX1,COL8A1,SERPINF2,NELL1,TMEM59L,MAP6,NTNG2,DNAH5,ECM1,SCUBE2,WNT7B,C1QTNF3,PAX1,ACSL6,WNT3,DLX6,IL6
GO:BP	tissue development	GO:0009888	7.17e-13	12.1446	1973	57	20	61806	SFRP4,SFRP2,ACAN,FOXL2,TMEM132E,KRT1,TNN,KRT10,ALX1,COL8A1,NELL1,TMEM59L,NTNG2,ECM1,SCUBE2,WNT7B,PAX1,WNT3,DLX6,IL6
GO:CC	cell periphery	GO:0071944	2.27e-12	11.6441	6270	57	29	61806	RXFP2,SFRP2,ACAN,FMOD,LYPD2,KRT1,FFAR4,PENK,ASIC1,TNN,KRT10,TMPRSS11A,ELFN1,JPH4,CP,OMG,SELP,COL8A1,CFB,SERPINF2,TRARG1,NTNG2,TMEM63C,ECM1,ALDH3A1,WNT7B,ACSL6,WNT3,IL6
GO:BP	anatomical structure development	GO:0048856	3.11e-12	11.5078	5836	57	29	61806	RXFP2,SFRP4,SFRP2,ACAN,FOXL2,TMEM132E,KRT1,PENK,TNN,KRT10,SCG2,OMG,IL36B,ALX1,COL8A1,SERPINF2,NELL1,TMEM59L,MAP6,NTNG2,DNAH5,ECM1,SCUBE2,WNT7B,PAX1,ACSL6,WNT3,DLX6,IL6
GO:BP	anatomical structure morphogenesis	GO:0009653	2.37e-11	10.6259	2722	57	21	61806	SFRP4,SFRP2,ACAN,FOXL2,KRT1,TNN,KRT10,SCG2,ALX1,COL8A1,SERPINF2,TMEM59L,MAP6,NTNG2,ECM1,SCUBE2,WNT7B,PAX1,WNT3,DLX6,IL6
GO:CC	membrane-bounded organelle	GO:0043227	3.92e-11	10.407	15649	57	41	61806	SFRP4,ACAN,FOXL2,FMOD,KRT1,FFAR4,PENK,ASIC1,KRT10,JPH4,KRT24,SCG2,CP,PRSS37,CFI,JAKMIP2,ALX1,SELP,COL8A1,CFB,SERPINF2,TRARG1,NELL1,PAGE4,TCL1A,TMEM59L,MAP1LC3C,MAP6,CILP2,DNAH5,ECM1,ARSI,ALDH3A1,WNT7B,C1QTNF3,ANKRD31,PAX1,ACSL6,WNT3,DLX6,IL6
GO:BP	biological regulation	GO:0065007	4.08e-11	10.3891	13096	57	39	61806	RXFP2,SFRP4,SFRP2,FOXL2,FMOD,KRT1,FFAR4,PENK,ASIC1,TNN,KRT10,ELFN1,JPH4,SCG2,CP,PRSS37,CFI,IL36B,ALX1,SELP,PRSS22,COL8A1,CFB,SERPINF2,NELL1,PAGE4,TCL1A,MAP6,NTNG2,ECM1,SCUBE2,WNT7B,C1QTNF3,ANKRD31,PAX1,C1S,WNT3,DLX6,IL6
GO:BP	animal organ development	GO:0048513	4.52e-11	10.3451	3591	57	23	61806	RXFP2,SFRP4,SFRP2,ACAN,FOXL2,TMEM132E,KRT1,TNN,KRT10,IL36B,ALX1,COL8A1,NELL1,TMEM59L,NTNG2,DNAH5,ECM1,SCUBE2,WNT7B,PAX1,WNT3,DLX6,IL6
GO:BP	regulation of biological process	GO:0050789	4.62e-11	10.3358	12361	57	38	61806	RXFP2,SFRP4,SFRP2,FOXL2,FMOD,KRT1,FFAR4,PENK,ASIC1,TNN,KRT10,JPH4,SCG2,CP,PRSS37,CFI,IL36B,ALX1,SELP,PRSS22,COL8A1,CFB,SERPINF2,NELL1,PAGE4,TCL1A,MAP6,NTNG2,ECM1,SCUBE2,WNT7B,C1QTNF3,ANKRD31,PAX1,C1S,WNT3,DLX6,IL6
GO:BP	cellular process	GO:0009987	2.22e-10	9.65462	19221	57	45	61806	RXFP2,SFRP4,SFRP2,ACAN,FOXL2,FMOD,TMEM132E,KRT1,FFAR4,PENK,ASIC1,TNN,KRT10,TMPRSS11A,ELFN1,JPH4,SCG2,CP,PRSS37,OMG,IL36B,ALX1,SELP,COL8A1,SERPINF2,TRARG1,NELL1,PAGE4,TCL1A,MAP1LC3C,MAP6,NTNG2,TMEM63C,DNAH5,ECM1,SCUBE2,ALDH3A1,WNT7B,C1QTNF3,ANKRD31,PAX1,ACSL6,WNT3,DLX6,IL6
GO:CC	organelle	GO:0043226	4.59e-10	9.33827	16770	57	41	61806	SFRP4,ACAN,FOXL2,FMOD,KRT1,FFAR4,PENK,ASIC1,KRT10,JPH4,KRT24,SCG2,CP,PRSS37,CFI,JAKMIP2,ALX1,SELP,COL8A1,CFB,SERPINF2,TRARG1,NELL1,PAGE4,TCL1A,TMEM59L,MAP1LC3C,MAP6,CILP2,DNAH5,ECM1,ARSI,ALDH3A1,WNT7B,C1QTNF3,ANKRD31,PAX1,ACSL6,WNT3,DLX6,IL6
GO:CC	extracellular matrix	GO:0031012	7.97e-10	9.0988	565	57	11	61806	SFRP2,ACAN,FMOD,KRT1,TNN,ELFN1,COL8A1,SERPINF2,NTNG2,ECM1,WNT3
GO:CC	external encapsulating structure	GO:0030312	8.12e-10	9.09057	566	57	11	61806	SFRP2,ACAN,FMOD,KRT1,TNN,ELFN1,COL8A1,SERPINF2,NTNG2,ECM1,WNT3
GO:BP	osteoblast differentiation	GO:0001649	1.39e-09	8.8577	228	57	9	61806	SFRP2,FFAR4,PENK,TNN,NELL1,SCUBE2,WNT7B,WNT3,IL6
GO:BP	positive regulation of developmental process	GO:0051094	1.55e-09	8.81063	1337	57	15	61806	SFRP4,SFRP2,FFAR4,TNN,KRT10,IL36B,ALX1,SERPINF2,NELL1,MAP6,ECM1,SCUBE2,WNT7B,WNT3,IL6
GO:BP	cell population proliferation	GO:0008283	2.71e-09	8.56691	1988	57	17	61806	SFRP4,SFRP2,PENK,TNN,SCG2,COL8A1,SERPINF2,NELL1,TCL1A,ECM1,SCUBE2,WNT7B,PAX1,ACSL6,WNT3,DLX6,IL6
GO:BP	positive regulation of multicellular organismal process	GO:0051240	8.42e-09	8.07493	1507	57	15	61806	SFRP2,FOXL2,FFAR4,PENK,TNN,IL36B,ALX1,SERPINF2,NELL1,MAP6,ECM1,SCUBE2,C1QTNF3,WNT3,IL6
GO:BP	ossification	GO:0001503	9.08e-09	8.04168	415	57	10	61806	SFRP2,FFAR4,PENK,TNN,NELL1,ECM1,SCUBE2,WNT7B,WNT3,IL6
GO:CC	cytoplasm	GO:0005737	9.46e-09	8.02394	12270	57	34	61806	SFRP4,ACAN,FMOD,KRT1,FFAR4,PENK,ASIC1,KRT10,JPH4,KRT24,SCG2,CP,PRSS37,JAKMIP2,IL36B,ALX1,SELP,COL8A1,SERPINF2,TRARG1,NELL1,PAGE4,TCL1A,TMEM59L,MAP1LC3C,MAP6,DNAH5,ECM1,ARSI,ALDH3A1,WNT7B,ACSL6,WNT3,IL6
GO:BP	animal organ morphogenesis	GO:0009887	2.25e-08	7.64753	1066	57	13	61806	SFRP4,SFRP2,ACAN,FOXL2,ALX1,COL8A1,TMEM59L,NTNG2,SCUBE2,WNT7B,PAX1,DLX6,IL6
GO:CC	vesicle	GO:0031982	3.08e-08	7.51154	3973	57	20	61806	KRT1,FFAR4,PENK,KRT10,KRT24,SCG2,CP,PRSS37,CFI,SELP,CFB,SERPINF2,TRARG1,MAP1LC3C,MAP6,CILP2,ECM1,WNT7B,C1QTNF3,WNT3
GO:BP	positive regulation of cell differentiation	GO:0045597	4.06e-08	7.3911	877	57	12	61806	SFRP4,SFRP2,FFAR4,IL36B,ALX1,SERPINF2,NELL1,MAP6,SCUBE2,WNT7B,WNT3,IL6
GO:CC	collagen-containing extracellular matrix	GO:0062023	4.3e-08	7.36644	429	57	9	61806	SFRP2,ACAN,FMOD,KRT1,TNN,COL8A1,SERPINF2,NTNG2,ECM1
GO:BP	regulation of multicellular organismal process	GO:0051239	4.41e-08	7.35549	2753	57	18	61806	SFRP4,SFRP2,FOXL2,KRT1,FFAR4,PENK,TNN,JPH4,IL36B,ALX1,SERPINF2,NELL1,MAP6,ECM1,SCUBE2,C1QTNF3,WNT3,IL6
GO:BP	regulation of osteoblast differentiation	GO:0045667	5e-08	7.30065	126	57	7	61806	SFRP2,FFAR4,TNN,NELL1,SCUBE2,WNT7B,IL6
GO:BP	positive regulation of cellular process	GO:0048522	6.62e-08	7.17891	5641	57	24	61806	SFRP4,SFRP2,FOXL2,FFAR4,TNN,SCG2,IL36B,ALX1,SELP,COL8A1,SERPINF2,NELL1,PAGE4,TCL1A,MAP6,ECM1,SCUBE2,WNT7B,C1QTNF3,ANKRD31,PAX1,WNT3,DLX6,IL6
GO:BP	positive regulation of osteoblast differentiation	GO:0045669	8.19e-08	7.08695	68	57	6	61806	SFRP2,FFAR4,NELL1,SCUBE2,WNT7B,IL6
GO:CC	endoplasmic reticulum lumen	GO:0005788	9.59e-08	7.01831	312	57	8	61806	PENK,SCG2,CP,COL8A1,ARSI,WNT7B,WNT3,IL6
GO:BP	regulation of developmental process	GO:0050793	9.73e-08	7.0117	2499	57	17	61806	SFRP4,SFRP2,KRT1,FFAR4,TNN,KRT10,IL36B,ALX1,SERPINF2,NELL1,MAP6,NTNG2,ECM1,SCUBE2,WNT7B,WNT3,IL6
GO:CC	intracellular organelle	GO:0043229	1.22e-07	6.9152	15965	57	37	61806	SFRP4,ACAN,FOXL2,FMOD,KRT1,FFAR4,PENK,ASIC1,KRT10,JPH4,KRT24,SCG2,CP,PRSS37,JAKMIP2,ALX1,SELP,COL8A1,SERPINF2,TRARG1,NELL1,PAGE4,TCL1A,TMEM59L,MAP1LC3C,MAP6,DNAH5,ECM1,ARSI,ALDH3A1,WNT7B,ANKRD31,PAX1,ACSL6,WNT3,DLX6,IL6
GO:BP	skeletal system development	GO:0001501	1.28e-07	6.89376	544	57	10	61806	SFRP4,SFRP2,ACAN,TNN,ALX1,ECM1,SCUBE2,WNT7B,PAX1,DLX6
GO:BP	positive regulation of response to stimulus	GO:0048584	1.67e-07	6.77684	2214	57	16	61806	SFRP4,SFRP2,KRT1,FFAR4,PENK,SCG2,CFI,SELP,CFB,SERPINF2,ECM1,SCUBE2,WNT7B,C1S,WNT3,IL6
GO:CC	intracellular membrane-bounded organelle	GO:0043231	2.44e-07	6.61346	14601	57	35	61806	SFRP4,ACAN,FOXL2,FMOD,KRT1,FFAR4,PENK,ASIC1,KRT10,JPH4,SCG2,CP,PRSS37,JAKMIP2,ALX1,SELP,COL8A1,SERPINF2,TRARG1,NELL1,PAGE4,TCL1A,TMEM59L,MAP1LC3C,MAP6,ECM1,ARSI,ALDH3A1,WNT7B,ANKRD31,PAX1,ACSL6,WNT3,DLX6,IL6
GO:CC	intracellular anatomical structure	GO:0005622	6.75e-07	6.17052	17820	57	38	61806	SFRP4,ACAN,FOXL2,FMOD,KRT1,FFAR4,PENK,ASIC1,KRT10,JPH4,KRT24,SCG2,CP,PRSS37,JAKMIP2,IL36B,ALX1,SELP,COL8A1,SERPINF2,TRARG1,NELL1,PAGE4,TCL1A,TMEM59L,MAP1LC3C,MAP6,DNAH5,ECM1,ARSI,ALDH3A1,WNT7B,ANKRD31,PAX1,ACSL6,WNT3,DLX6,IL6
GO:BP	defense response	GO:0006952	7.82e-07	6.10656	1742	57	14	61806	KRT1,FFAR4,PENK,ASIC1,SCG2,CFI,IL36B,SELP,CFB,SERPINF2,ECM1,C1QTNF3,C1S,IL6
GO:CC	membrane	GO:0016020	1.03642e-06	5.98447	9856	57	28	61806	RXFP2,LYPD2,TMEM132E,KRT1,FFAR4,PENK,ASIC1,KRT10,TMPRSS11A,ELFN1,JPH4,CP,CFI,OMG,SELP,CFB,TRARG1,TMEM59L,MAP1LC3C,MAP6,NTNG2,TMEM63C,ALDH3A1,WNT7B,C1QTNF3,ACSL6,WNT3,IL6
GO:BP	regulation of cell communication	GO:0010646	1.1175e-06	5.95175	3363	57	18	61806	SFRP4,SFRP2,FOXL2,FFAR4,ASIC1,TNN,JPH4,SCG2,SELP,SERPINF2,PAGE4,NTNG2,ECM1,SCUBE2,WNT7B,C1QTNF3,WNT3,IL6
GO:BP	response to stimulus	GO:0050896	1.13801e-06	5.94385	9000	57	28	61806	RXFP2,SFRP4,SFRP2,FMOD,KRT1,FFAR4,PENK,ASIC1,TNN,SCG2,CFI,OMG,IL36B,SELP,CFB,SERPINF2,TRARG1,PAGE4,TCL1A,MAP1LC3C,ECM1,SCUBE2,ALDH3A1,WNT7B,C1QTNF3,C1S,WNT3,IL6
GO:BP	regulation of cellular process	GO:0050794	1.14953e-06	5.93948	11130	57	31	61806	RXFP2,SFRP4,SFRP2,FOXL2,FMOD,FFAR4,PENK,ASIC1,TNN,JPH4,SCG2,CP,IL36B,ALX1,SELP,COL8A1,SERPINF2,NELL1,PAGE4,TCL1A,MAP6,NTNG2,ECM1,SCUBE2,WNT7B,C1QTNF3,ANKRD31,PAX1,WNT3,DLX6,IL6
GO:BP	regulation of signaling	GO:0023051	1.17719e-06	5.92915	3374	57	18	61806	SFRP4,SFRP2,FOXL2,FFAR4,ASIC1,TNN,JPH4,SCG2,SELP,SERPINF2,PAGE4,NTNG2,ECM1,SCUBE2,WNT7B,C1QTNF3,WNT3,IL6
GO:BP	response to stress	GO:0006950	1.84662e-06	5.73362	3938	57	19	61806	SFRP2,KRT1,FFAR4,PENK,ASIC1,SCG2,CFI,OMG,IL36B,SELP,CFB,SERPINF2,PAGE4,MAP1LC3C,ECM1,WNT7B,C1QTNF3,C1S,IL6
GO:BP	regulation of response to stimulus	GO:0048583	2.11216e-06	5.67527	3970	57	19	61806	SFRP4,SFRP2,KRT1,FFAR4,PENK,TNN,SCG2,CFI,SELP,CFB,SERPINF2,PAGE4,ECM1,SCUBE2,WNT7B,C1QTNF3,C1S,WNT3,IL6
GO:BP	regulation of cell differentiation	GO:0045595	2.86873e-06	5.54231	1587	57	13	61806	SFRP4,SFRP2,FFAR4,TNN,IL36B,ALX1,SERPINF2,NELL1,MAP6,SCUBE2,WNT7B,WNT3,IL6
GO:CC	plasma membrane	GO:0005886	3.41493e-06	5.46662	5788	57	21	61806	RXFP2,LYPD2,KRT1,FFAR4,PENK,ASIC1,KRT10,TMPRSS11A,JPH4,CP,OMG,SELP,CFB,TRARG1,NTNG2,TMEM63C,ALDH3A1,WNT7B,ACSL6,WNT3,IL6
GO:MF	serine-type endopeptidase activity	GO:0004252	4.94687e-06	5.30567	179	57	6	61806	TMPRSS11A,PRSS37,CFI,PRSS22,CFB,C1S
GO:BP	cell-cell signaling	GO:0007267	5.01799e-06	5.29947	1663	57	13	61806	SFRP4,SFRP2,FOXL2,FFAR4,PENK,ASIC1,TNN,JPH4,NTNG2,WNT7B,C1QTNF3,WNT3,IL6
GO:BP	response to external stimulus	GO:0009605	5.32561e-06	5.27363	2814	57	16	61806	SFRP2,KRT1,FFAR4,PENK,SCG2,CFI,IL36B,SELP,CFB,SERPINF2,PAGE4,MAP1LC3C,C1QTNF3,C1S,WNT3,IL6
GO:BP	circulatory system development	GO:0072359	8.55595e-06	5.06773	1109	57	11	61806	SFRP2,ACAN,KRT1,TNN,SCG2,COL8A1,SERPINF2,DNAH5,ECM1,WNT7B,IL6
GO:MF	serine-type peptidase activity	GO:0008236	8.74723e-06	5.05813	197	57	6	61806	TMPRSS11A,PRSS37,CFI,PRSS22,CFB,C1S
GO:BP	cell communication	GO:0007154	8.75717e-06	5.05764	6551	57	23	61806	RXFP2,SFRP4,SFRP2,FOXL2,FMOD,FFAR4,PENK,ASIC1,TNN,JPH4,SCG2,IL36B,SELP,SERPINF2,PAGE4,MAP1LC3C,NTNG2,ECM1,SCUBE2,WNT7B,C1QTNF3,WNT3,IL6
GO:BP	blood vessel morphogenesis	GO:0048514	8.97139e-06	5.04714	616	57	9	61806	SFRP2,KRT1,TNN,SCG2,COL8A1,SERPINF2,ECM1,WNT7B,IL6
GO:BP	nervous system development	GO:0007399	9.16151e-06	5.03803	2504	57	15	61806	SFRP2,ACAN,TMEM132E,PENK,TNN,OMG,NELL1,MAP6,NTNG2,DNAH5,WNT7B,ACSL6,WNT3,DLX6,IL6
GO:MF	serine hydrolase activity	GO:0017171	9.85578e-06	5.00631	201	57	6	61806	TMPRSS11A,PRSS37,CFI,PRSS22,CFB,C1S
GO:BP	tube morphogenesis	GO:0035239	1.065e-05	4.97265	863	57	10	61806	SFRP2,KRT1,TNN,SCG2,COL8A1,SERPINF2,TMEM59L,ECM1,WNT7B,IL6
GO:BP	epithelium development	GO:0060429	2.05519e-05	4.68715	1208	57	11	61806	SFRP4,SFRP2,FOXL2,TMEM132E,KRT1,KRT10,TMEM59L,WNT7B,PAX1,WNT3,DLX6
GO:BP	cellular response to stimulus	GO:0051716	2.14198e-05	4.66919	7494	57	24	61806	RXFP2,SFRP4,SFRP2,FMOD,FFAR4,PENK,ASIC1,TNN,SCG2,OMG,IL36B,SELP,SERPINF2,TRARG1,PAGE4,TCL1A,MAP1LC3C,ECM1,SCUBE2,ALDH3A1,WNT7B,C1QTNF3,WNT3,IL6
GO:BP	blood vessel development	GO:0001568	2.79159e-05	4.55415	703	57	9	61806	SFRP2,KRT1,TNN,SCG2,COL8A1,SERPINF2,ECM1,WNT7B,IL6
GO:BP	extracellular matrix organization	GO:0030198	3.36768e-05	4.47267	321	57	7	61806	SFRP2,ACAN,FMOD,COL8A1,SERPINF2,NTNG2,IL6
GO:BP	extracellular structure organization	GO:0043062	3.44007e-05	4.46343	322	57	7	61806	SFRP2,ACAN,FMOD,COL8A1,SERPINF2,NTNG2,IL6
GO:CC	blood microparticle	GO:0072562	3.54016e-05	4.45098	137	57	5	61806	KRT1,CP,CFB,SERPINF2,C1S
GO:BP	external encapsulating structure organization	GO:0045229	3.58883e-05	4.44505	324	57	7	61806	SFRP2,ACAN,FMOD,COL8A1,SERPINF2,NTNG2,IL6
GO:BP	vasculature development	GO:0001944	4.03646e-05	4.394	734	57	9	61806	SFRP2,KRT1,TNN,SCG2,COL8A1,SERPINF2,ECM1,WNT7B,IL6
GO:BP	signaling	GO:0023052	4.19101e-05	4.37768	6492	57	22	61806	RXFP2,SFRP4,SFRP2,FOXL2,FMOD,FFAR4,PENK,ASIC1,TNN,JPH4,SCG2,IL36B,SELP,SERPINF2,PAGE4,NTNG2,ECM1,SCUBE2,WNT7B,C1QTNF3,WNT3,IL6
GO:CC	endoplasmic reticulum	GO:0005783	5.13846e-05	4.28917	2031	57	12	61806	PENK,JPH4,SCG2,CP,COL8A1,TCL1A,ARSI,ALDH3A1,WNT7B,ACSL6,WNT3,IL6
GO:MF	molecular function regulator activity	GO:0098772	5.56182e-05	4.25478	1967	57	12	61806	SFRP2,FOXL2,PENK,ELFN1,SCG2,IL36B,PRSS22,SERPINF2,TCL1A,WNT7B,WNT3,IL6
GO:BP	regulation of cell population proliferation	GO:0042127	6.06812e-05	4.21695	1683	57	12	61806	SFRP4,SFRP2,TNN,SCG2,SERPINF2,NELL1,TCL1A,ECM1,SCUBE2,WNT3,DLX6,IL6
GO:CC	cytoplasmic vesicle	GO:0031410	6.11147e-05	4.21385	2487	57	13	61806	KRT1,FFAR4,PENK,SCG2,PRSS37,SELP,SERPINF2,TRARG1,MAP1LC3C,MAP6,ECM1,WNT7B,WNT3
GO:CC	intracellular vesicle	GO:0097708	6.16743e-05	4.2099	2489	57	13	61806	KRT1,FFAR4,PENK,SCG2,PRSS37,SELP,SERPINF2,TRARG1,MAP1LC3C,MAP6,ECM1,WNT7B,WNT3
GO:BP	response to chemical	GO:0042221	6.98645e-05	4.15574	4383	57	18	61806	RXFP2,SFRP4,SFRP2,FMOD,FFAR4,PENK,ASIC1,SCG2,IL36B,SELP,TRARG1,PAGE4,TCL1A,ECM1,ALDH3A1,WNT7B,WNT3,IL6
GO:BP	inflammatory response	GO:0006954	7.22902e-05	4.14092	786	57	9	61806	KRT1,FFAR4,SCG2,IL36B,SELP,SERPINF2,ECM1,C1QTNF3,IL6
GO:BP	positive regulation of cell communication	GO:0010647	7.59038e-05	4.11974	1718	57	12	61806	SFRP4,SFRP2,FOXL2,FFAR4,SELP,SERPINF2,ECM1,SCUBE2,WNT7B,C1QTNF3,WNT3,IL6
GO:CC	extracellular exosome	GO:0070062	7.62598e-05	4.1177	2108	57	12	61806	KRT1,KRT10,KRT24,CP,CFI,CFB,SERPINF2,CILP2,ECM1,WNT7B,C1QTNF3,WNT3
GO:BP	cellular component organization	GO:0016043	7.72808e-05	4.11193	8002	57	24	61806	SFRP4,SFRP2,ACAN,FOXL2,FMOD,KRT1,ASIC1,TNN,KRT10,ELFN1,OMG,SELP,COL8A1,SERPINF2,TRARG1,TCL1A,MAP1LC3C,MAP6,NTNG2,DNAH5,WNT7B,ANKRD31,WNT3,IL6
GO:BP	positive regulation of signaling	GO:0023056	7.78453e-05	4.10877	1722	57	12	61806	SFRP4,SFRP2,FOXL2,FFAR4,SELP,SERPINF2,ECM1,SCUBE2,WNT7B,C1QTNF3,WNT3,IL6
GO:BP	tube development	GO:0035295	8.42089e-05	4.07464	1076	57	10	61806	SFRP2,KRT1,TNN,SCG2,COL8A1,SERPINF2,TMEM59L,ECM1,WNT7B,IL6
GO:CC	extracellular vesicle	GO:1903561	8.5957e-05	4.06572	2132	57	12	61806	KRT1,KRT10,KRT24,CP,CFI,CFB,SERPINF2,CILP2,ECM1,WNT7B,C1QTNF3,WNT3
GO:CC	extracellular membrane-bounded organelle	GO:0065010	8.63839e-05	4.06357	2133	57	12	61806	KRT1,KRT10,KRT24,CP,CFI,CFB,SERPINF2,CILP2,ECM1,WNT7B,C1QTNF3,WNT3
GO:CC	extracellular organelle	GO:0043230	8.63839e-05	4.06357	2133	57	12	61806	KRT1,KRT10,KRT24,CP,CFI,CFB,SERPINF2,CILP2,ECM1,WNT7B,C1QTNF3,WNT3
GO:BP	cell development	GO:0048468	9.85274e-05	4.00644	2142	57	13	61806	SFRP2,ACAN,FOXL2,TMEM132E,TNN,OMG,ALX1,MAP6,NTNG2,ECM1,WNT7B,WNT3,IL6
GO:MF	receptor ligand activity	GO:0048018	0.000115177	3.93864	500	57	7	61806	SFRP2,PENK,SCG2,IL36B,WNT7B,WNT3,IL6
GO:BP	cellular response to chemical stimulus	GO:0070887	0.00012356	3.90812	3049	57	15	61806	RXFP2,SFRP4,SFRP2,FMOD,PENK,SCG2,IL36B,TRARG1,PAGE4,TCL1A,ECM1,ALDH3A1,WNT7B,WNT3,IL6
GO:BP	cellular component organization or biogenesis	GO:0071840	0.000124832	3.90367	8203	57	24	61806	SFRP4,SFRP2,ACAN,FOXL2,FMOD,KRT1,ASIC1,TNN,KRT10,ELFN1,OMG,SELP,COL8A1,SERPINF2,TRARG1,TCL1A,MAP1LC3C,MAP6,NTNG2,DNAH5,WNT7B,ANKRD31,WNT3,IL6
GO:MF	signaling receptor activator activity	GO:0030546	0.00012807	3.89255	508	57	7	61806	SFRP2,PENK,SCG2,IL36B,WNT7B,WNT3,IL6
GO:BP	anatomical structure formation involved in morphogenesis	GO:0048646	0.000164923	3.78272	1157	57	10	61806	SFRP2,KRT1,TNN,SCG2,COL8A1,ECM1,PAX1,WNT3,DLX6,IL6
GO:MF	signaling receptor regulator activity	GO:0030545	0.000199704	3.69961	543	57	7	61806	SFRP2,PENK,SCG2,IL36B,WNT7B,WNT3,IL6
GO:BP	cell adhesion	GO:0007155	0.000210668	3.6764	1521	57	11	61806	SFRP2,ACAN,TNN,OMG,IL36B,SELP,COL8A1,SERPINF2,NTNG2,WNT7B,IL6
GO:BP	negative regulation of response to stimulus	GO:0048585	0.000357489	3.44674	1604	57	11	61806	SFRP4,SFRP2,KRT1,FFAR4,TNN,SCG2,SERPINF2,ECM1,C1QTNF3,WNT3,IL6
GO:CC	Golgi lumen	GO:0005796	0.000500768	3.30036	103	57	4	61806	ACAN,FMOD,WNT7B,WNT3
GO:BP	regulation of macromolecule metabolic process	GO:0060255	0.000541147	3.26669	6842	57	21	61806	SFRP4,SFRP2,FOXL2,FFAR4,JPH4,CP,PRSS37,IL36B,ALX1,PRSS22,SERPINF2,NELL1,PAGE4,TCL1A,ECM1,C1QTNF3,ANKRD31,PAX1,WNT3,DLX6,IL6
GO:BP	neurogenesis	GO:0022008	0.000565201	3.2478	1680	57	11	61806	SFRP2,TMEM132E,PENK,TNN,OMG,MAP6,NTNG2,WNT7B,ACSL6,WNT3,IL6
GO:BP	regulation of signal transduction	GO:0009966	0.000612124	3.21316	2968	57	14	61806	SFRP4,SFRP2,FFAR4,TNN,SCG2,SELP,SERPINF2,PAGE4,ECM1,SCUBE2,WNT7B,C1QTNF3,WNT3,IL6
GO:BP	collagen fibril organization	GO:0030199	0.000660303	3.18026	64	57	4	61806	SFRP2,ACAN,FMOD,SERPINF2
GO:BP	metabolic process	GO:0008152	0.000662112	3.17907	14408	57	31	61806	SFRP4,SFRP2,ACAN,FOXL2,KRT1,FFAR4,KRT10,TMPRSS11A,JPH4,CP,PRSS37,CFI,IL36B,ALX1,PRSS22,CFB,SERPINF2,NELL1,PAGE4,TCL1A,MAP1LC3C,ECM1,ALDH3A1,C1QTNF3,ANKRD31,PAX1,ACSL6,C1S,WNT3,DLX6,IL6
GO:BP	response to organic substance	GO:0010033	0.000797174	3.09845	3034	57	14	61806	RXFP2,SFRP4,SFRP2,FMOD,PENK,ASIC1,IL36B,SELP,TRARG1,TCL1A,ECM1,WNT7B,WNT3,IL6
GO:MF	cytokine activity	GO:0005125	0.000803468	3.09503	237	57	5	61806	SCG2,IL36B,WNT7B,WNT3,IL6
GO:BP	regulation of multicellular organismal development	GO:2000026	0.000906759	3.04251	1394	57	10	61806	SFRP4,SFRP2,KRT1,TNN,IL36B,NELL1,MAP6,ECM1,WNT3,IL6
GO:BP	angiogenesis	GO:0001525	0.000947912	3.02323	526	57	7	61806	SFRP2,KRT1,TNN,SCG2,COL8A1,ECM1,IL6
GO:MF	endopeptidase activity	GO:0004175	0.000954224	3.02035	440	57	6	61806	TMPRSS11A,PRSS37,CFI,PRSS22,CFB,C1S
GO:BP	proteolysis	GO:0006508	0.00101448	2.99376	1783	57	11	61806	SFRP2,ACAN,FOXL2,TMPRSS11A,PRSS37,CFI,PRSS22,CFB,SERPINF2,ECM1,C1S
GO:BP	organic substance metabolic process	GO:0071704	0.00120021	2.92074	13929	57	30	61806	SFRP4,SFRP2,ACAN,FOXL2,KRT1,FFAR4,KRT10,TMPRSS11A,JPH4,CP,PRSS37,CFI,IL36B,ALX1,PRSS22,CFB,SERPINF2,NELL1,PAGE4,TCL1A,ECM1,ALDH3A1,C1QTNF3,ANKRD31,PAX1,ACSL6,C1S,WNT3,DLX6,IL6
GO:BP	negative regulation of biological process	GO:0048519	0.00124526	2.90474	5918	57	19	61806	SFRP4,SFRP2,FOXL2,KRT1,FFAR4,ASIC1,TNN,JPH4,SCG2,CP,ALX1,SERPINF2,NELL1,PAGE4,TCL1A,ECM1,C1QTNF3,WNT3,IL6
GO:BP	macromolecule metabolic process	GO:0043170	0.00128882	2.88981	12330	57	28	61806	SFRP4,SFRP2,ACAN,FOXL2,KRT1,FFAR4,KRT10,TMPRSS11A,JPH4,CP,PRSS37,CFI,IL36B,ALX1,PRSS22,CFB,SERPINF2,NELL1,PAGE4,TCL1A,ECM1,C1QTNF3,ANKRD31,PAX1,C1S,WNT3,DLX6,IL6
GO:BP	negative regulation of cellular process	GO:0048523	0.00129566	2.88751	4749	57	17	61806	SFRP4,SFRP2,FOXL2,FFAR4,ASIC1,TNN,JPH4,SCG2,CP,ALX1,NELL1,PAGE4,TCL1A,ECM1,C1QTNF3,WNT3,IL6
GO:BP	generation of neurons	GO:0048699	0.00142015	2.84766	1465	57	10	61806	SFRP2,TMEM132E,TNN,OMG,MAP6,NTNG2,WNT7B,ACSL6,WNT3,IL6
GO:BP	neuron development	GO:0048666	0.00142386	2.84653	1122	57	9	61806	SFRP2,TMEM132E,TNN,OMG,MAP6,NTNG2,WNT7B,WNT3,IL6
GO:BP	signal transduction	GO:0007165	0.00150883	2.82136	5993	57	19	61806	RXFP2,SFRP4,SFRP2,FMOD,FFAR4,PENK,ASIC1,TNN,SCG2,IL36B,SELP,SERPINF2,PAGE4,ECM1,SCUBE2,WNT7B,C1QTNF3,WNT3,IL6
GO:BP	regulation of biological quality	GO:0065008	0.00160468	2.79461	3726	57	15	61806	SFRP4,FOXL2,KRT1,FFAR4,ASIC1,JPH4,CP,SELP,SERPINF2,TCL1A,NTNG2,WNT7B,C1QTNF3,WNT3,IL6
GO:BP	regulation of metabolic process	GO:0019222	0.00189444	2.72252	7377	57	21	61806	SFRP4,SFRP2,FOXL2,FFAR4,JPH4,CP,PRSS37,IL36B,ALX1,PRSS22,SERPINF2,NELL1,PAGE4,TCL1A,ECM1,C1QTNF3,ANKRD31,PAX1,WNT3,DLX6,IL6
GO:BP	positive regulation of signal transduction	GO:0009967	0.00201291	2.69618	1523	57	10	61806	SFRP4,SFRP2,FFAR4,SELP,SERPINF2,ECM1,SCUBE2,WNT7B,WNT3,IL6
GO:BP	regulation of gene expression	GO:0010468	0.00201664	2.69537	5494	57	18	61806	SFRP4,SFRP2,FOXL2,FFAR4,JPH4,CP,PRSS37,IL36B,ALX1,SERPINF2,NELL1,PAGE4,ECM1,C1QTNF3,PAX1,WNT3,DLX6,IL6
GO:BP	cartilage development	GO:0051216	0.00226361	2.6452	204	57	5	61806	SFRP2,ACAN,ECM1,SCUBE2,WNT7B
GO:BP	positive regulation of metabolic process	GO:0009893	0.00240804	2.61834	3849	57	15	61806	SFRP4,SFRP2,FOXL2,FFAR4,IL36B,ALX1,PRSS22,SERPINF2,PAGE4,TCL1A,C1QTNF3,ANKRD31,PAX1,WNT3,IL6
GO:BP	embryonic morphogenesis	GO:0048598	0.00270249	2.56824	616	57	7	61806	SFRP2,FOXL2,ALX1,COL8A1,WNT7B,WNT3,DLX6
GO:BP	cellular response to organic substance	GO:0071310	0.00271089	2.56689	2405	57	12	61806	RXFP2,SFRP4,SFRP2,FMOD,PENK,IL36B,TRARG1,TCL1A,ECM1,WNT7B,WNT3,IL6
GO:CC	intrinsic component of membrane	GO:0031224	0.0027538	2.56007	5902	57	17	61806	RXFP2,LYPD2,TMEM132E,FFAR4,ASIC1,TMPRSS11A,ELFN1,JPH4,OMG,SELP,TRARG1,TMEM59L,NTNG2,TMEM63C,ALDH3A1,ACSL6,IL6
GO:CC	secretory granule	GO:0030141	0.00286028	2.54359	870	57	7	61806	KRT1,PENK,SCG2,PRSS37,SELP,SERPINF2,ECM1
GO:BP	regulation of anatomical structure morphogenesis	GO:0022603	0.00335388	2.47445	919	57	8	61806	SFRP2,KRT1,TNN,MAP6,NTNG2,ECM1,WNT3,IL6
GO:MF	signaling receptor binding	GO:0005102	0.00340318	2.46812	1555	57	9	61806	SFRP2,PENK,TNN,SCG2,IL36B,ECM1,WNT7B,WNT3,IL6
GO:CC	Golgi apparatus	GO:0005794	0.00356827	2.44754	1650	57	9	61806	ACAN,FMOD,ASIC1,JAKMIP2,ALX1,TMEM59L,MAP6,WNT7B,WNT3
GO:BP	skeletal system morphogenesis	GO:0048705	0.00415931	2.38098	231	57	5	61806	SFRP4,ACAN,ALX1,SCUBE2,PAX1
GO:CC	bounding membrane of organelle	GO:0098588	0.00428178	2.36838	2132	57	10	61806	FFAR4,JPH4,CP,SELP,TMEM59L,MAP1LC3C,MAP6,WNT7B,ACSL6,WNT3
GO:BP	positive regulation of cell population proliferation	GO:0008284	0.00441703	2.35487	954	57	8	61806	SFRP2,SCG2,SERPINF2,TCL1A,ECM1,SCUBE2,DLX6,IL6
GO:BP	bone development	GO:0060348	0.00452281	2.34459	235	57	5	61806	SFRP4,TNN,ECM1,SCUBE2,PAX1
GO:BP	positive regulation of macromolecule metabolic process	GO:0010604	0.00484895	2.31435	3535	57	14	61806	SFRP4,SFRP2,FOXL2,IL36B,ALX1,PRSS22,SERPINF2,PAGE4,TCL1A,C1QTNF3,ANKRD31,PAX1,WNT3,IL6
GO:BP	neuron projection development	GO:0031175	0.00499121	2.30179	970	57	8	61806	SFRP2,TNN,OMG,MAP6,NTNG2,WNT7B,WNT3,IL6
GO:BP	cell motility	GO:0048870	0.00529963	2.27575	1698	57	10	61806	SFRP2,TNN,SCG2,PRSS37,ALX1,SELP,NTNG2,DNAH5,ECM1,IL6
GO:CC	cell surface	GO:0009986	0.00557281	2.25393	966	57	7	61806	SFRP4,ASIC1,TNN,KRT10,SELP,SERPINF2,SCUBE2
GO:BP	epithelial cell proliferation	GO:0050673	0.00567132	2.24632	441	57	6	61806	SFRP2,SCG2,COL8A1,ECM1,DLX6,IL6
GO:MF	extracellular matrix structural constituent	GO:0005201	0.00606041	2.2175	174	57	4	61806	ACAN,FMOD,COL8A1,ECM1
GO:BP	negative regulation of cell communication	GO:0010648	0.00651998	2.18575	1352	57	9	61806	SFRP4,SFRP2,FFAR4,ASIC1,TNN,SCG2,ECM1,C1QTNF3,IL6
GO:BP	chondrocyte development	GO:0002063	0.00663042	2.17846	33	57	3	61806	SFRP2,ACAN,ECM1
GO:BP	regulation of response to stress	GO:0080134	0.00667731	2.1754	1356	57	9	61806	SFRP2,KRT1,FFAR4,PENK,SERPINF2,PAGE4,WNT7B,C1QTNF3,IL6
GO:BP	negative regulation of signaling	GO:0023057	0.00671715	2.17282	1357	57	9	61806	SFRP4,SFRP2,FFAR4,ASIC1,TNN,SCG2,ECM1,C1QTNF3,IL6
GO:BP	epithelial cell differentiation	GO:0030855	0.00692645	2.15949	711	57	7	61806	SFRP4,FOXL2,TMEM132E,KRT1,KRT10,WNT7B,DLX6
GO:MF	peptidase activity	GO:0008233	0.0071991	2.14272	629	57	6	61806	TMPRSS11A,PRSS37,CFI,PRSS22,CFB,C1S
GO:BP	chondrocyte differentiation	GO:0002062	0.00768513	2.11435	118	57	4	61806	SFRP2,ACAN,ECM1,SCUBE2
GO:BP	regulation of locomotion	GO:0040012	0.0077446	2.111	1030	57	8	61806	SFRP2,TNN,SCG2,SELP,NTNG2,ECM1,WNT3,IL6
GO:BP	negative regulation of multicellular organismal process	GO:0051241	0.0080231	2.09566	1035	57	8	61806	SFRP2,KRT1,FFAR4,SERPINF2,ECM1,C1QTNF3,WNT3,IL6
GO:CC	supramolecular polymer	GO:0099081	0.00815318	2.08867	1026	57	7	61806	KRT1,KRT10,KRT24,COL8A1,MAP1LC3C,MAP6,DNAH5
GO:BP	neuron differentiation	GO:0030182	0.00829445	2.08121	1393	57	9	61806	SFRP2,TMEM132E,TNN,OMG,MAP6,NTNG2,WNT7B,WNT3,IL6
GO:BP	protein metabolic process	GO:0019538	0.00879352	2.05584	5462	57	17	61806	SFRP2,ACAN,FOXL2,KRT1,KRT10,TMPRSS11A,CP,PRSS37,CFI,PRSS22,CFB,SERPINF2,NELL1,TCL1A,ECM1,C1S,IL6
GO:BP	positive regulation of cell adhesion	GO:0045785	0.00887625	2.05177	477	57	6	61806	SFRP2,IL36B,SELP,COL8A1,SERPINF2,IL6
GO:CC	secretory vesicle	GO:0099503	0.00904047	2.04381	1043	57	7	61806	KRT1,PENK,SCG2,PRSS37,SELP,SERPINF2,ECM1
GO:BP	connective tissue development	GO:0061448	0.00954164	2.02038	274	57	5	61806	SFRP2,ACAN,ECM1,SCUBE2,WNT7B
GO:BP	complement activation	GO:0006956	0.0112825	1.9476	130	57	4	61806	KRT1,CFI,CFB,C1S
GO:BP	MAPK cascade	GO:0000165	0.0115348	1.93799	769	57	7	61806	SFRP2,FFAR4,SCG2,SERPINF2,PAGE4,WNT7B,IL6
GO:BP	regulation of cell adhesion	GO:0030155	0.0121306	1.91612	775	57	7	61806	SFRP2,TNN,IL36B,SELP,COL8A1,SERPINF2,IL6
GO:BP	regulation of angiogenesis	GO:0045765	0.0121438	1.91565	288	57	5	61806	SFRP2,KRT1,TNN,ECM1,IL6
GO:BP	regulation of vasculature development	GO:1901342	0.0129807	1.8867	292	57	5	61806	SFRP2,KRT1,TNN,ECM1,IL6
GO:BP	canonical Wnt signaling pathway involved in osteoblast differentiation	GO:0044339	0.0139022	1.85692	5	57	2	61806	TNN,WNT3
GO:BP	sclerotome development	GO:0061056	0.0139022	1.85692	5	57	2	61806	SFRP2,PAX1
GO:CC	neuronal dense core vesicle	GO:0098992	0.0140862	1.85121	14	57	2	61806	PENK,SCG2
GO:BP	cell migration	GO:0016477	0.0148394	1.82858	1498	57	9	61806	SFRP2,TNN,SCG2,PRSS37,ALX1,SELP,NTNG2,ECM1,IL6
GO:BP	canonical Wnt signaling pathway	GO:0060070	0.015029	1.82307	301	57	5	61806	SFRP4,SFRP2,TNN,WNT7B,WNT3
GO:CC	polymeric cytoskeletal fiber	GO:0099513	0.0154147	1.81206	779	57	6	61806	KRT1,KRT10,KRT24,MAP1LC3C,MAP6,DNAH5
GO:BP	embryo development	GO:0009790	0.015669	1.80496	1135	57	8	61806	SFRP2,FOXL2,ALX1,COL8A1,WNT7B,PAX1,WNT3,DLX6
GO:BP	plasma membrane bounded cell projection organization	GO:0120036	0.0157295	1.80329	1509	57	9	61806	SFRP2,TNN,OMG,MAP6,NTNG2,DNAH5,WNT7B,WNT3,IL6
GO:BP	secretion by cell	GO:0032940	0.0158842	1.79904	808	57	7	61806	FOXL2,FFAR4,ASIC1,SCG2,TRARG1,C1QTNF3,IL6
GO:MF	structural molecule activity	GO:0005198	0.0188824	1.72394	1097	57	7	61806	ACAN,FMOD,KRT1,KRT10,KRT24,COL8A1,ECM1
GO:BP	cell projection organization	GO:0030030	0.0194621	1.71081	1550	57	9	61806	SFRP2,TNN,OMG,MAP6,NTNG2,DNAH5,WNT7B,WNT3,IL6
GO:BP	humoral immune response	GO:0006959	0.0195814	1.70816	318	57	5	61806	KRT1,CFI,CFB,C1S,IL6
GO:CC	basement membrane	GO:0005604	0.0204353	1.68962	99	57	3	61806	ACAN,COL8A1,NTNG2
GO:BP	negative regulation of non-canonical Wnt signaling pathway	GO:2000051	0.020841	1.68108	6	57	2	61806	SFRP4,SFRP2
GO:BP	organonitrogen compound metabolic process	GO:1901564	0.0227753	1.64254	6522	57	18	61806	SFRP2,ACAN,FOXL2,KRT1,KRT10,TMPRSS11A,CP,PRSS37,CFI,PRSS22,CFB,SERPINF2,NELL1,TCL1A,ECM1,ACSL6,C1S,IL6
GO:BP	regulation of primary metabolic process	GO:0080090	0.0228544	1.64103	5869	57	17	61806	SFRP4,SFRP2,FOXL2,CP,PRSS37,ALX1,PRSS22,SERPINF2,NELL1,PAGE4,TCL1A,ECM1,C1QTNF3,ANKRD31,PAX1,DLX6,IL6
GO:BP	export from cell	GO:0140352	0.0248083	1.6054	866	57	7	61806	FOXL2,FFAR4,ASIC1,SCG2,TRARG1,C1QTNF3,IL6
GO:BP	transport	GO:0006810	0.0313643	1.50356	4755	57	15	61806	SFRP4,FOXL2,FFAR4,ASIC1,JPH4,SCG2,CP,CFI,TRARG1,MAP1LC3C,MAP6,TMEM63C,DNAH5,C1QTNF3,IL6
GO:BP	primary metabolic process	GO:0044238	0.0316013	1.5003	12718	57	26	61806	SFRP4,SFRP2,ACAN,FOXL2,KRT1,KRT10,TMPRSS11A,CP,PRSS37,CFI,ALX1,PRSS22,CFB,SERPINF2,NELL1,PAGE4,TCL1A,ECM1,ALDH3A1,C1QTNF3,ANKRD31,PAX1,ACSL6,C1S,DLX6,IL6
GO:CC	platelet dense granule	GO:0042827	0.032372	1.48983	21	57	2	61806	SELP,ECM1
GO:BP	secretion	GO:0046903	0.0427255	1.36931	943	57	7	61806	FOXL2,FFAR4,ASIC1,SCG2,TRARG1,C1QTNF3,IL6
GO:BP	regulation of intracellular signal transduction	GO:1902531	0.0429448	1.36709	1714	57	9	61806	SFRP2,FFAR4,SELP,SERPINF2,PAGE4,ECM1,WNT7B,C1QTNF3,IL6
GO:BP	regulation of response to external stimulus	GO:0032101	0.0441849	1.35473	948	57	7	61806	KRT1,FFAR4,SCG2,SERPINF2,C1QTNF3,WNT3,IL6
GO:CC	membrane-enclosed lumen	GO:0031974	0.0442804	1.35379	6637	57	16	61806	ACAN,FOXL2,FMOD,KRT1,PENK,SCG2,CP,ALX1,COL8A1,SERPINF2,TCL1A,ECM1,ARSI,WNT7B,WNT3,IL6
GO:CC	organelle lumen	GO:0043233	0.0442804	1.35379	6637	57	16	61806	ACAN,FOXL2,FMOD,KRT1,PENK,SCG2,CP,ALX1,COL8A1,SERPINF2,TCL1A,ECM1,ARSI,WNT7B,WNT3,IL6
GO:CC	intracellular organelle lumen	GO:0070013	0.0442804	1.35379	6637	57	16	61806	ACAN,FOXL2,FMOD,KRT1,PENK,SCG2,CP,ALX1,COL8A1,SERPINF2,TCL1A,ECM1,ARSI,WNT7B,WNT3,IL6
GO:BP	positive regulation of immune system process	GO:0002684	0.0459902	1.33733	954	57	7	61806	KRT1,CFI,IL36B,SELP,CFB,C1S,IL6
GO:BP	establishment of localization	GO:0051234	0.0460538	1.33673	4913	57	15	61806	SFRP4,FOXL2,FFAR4,ASIC1,JPH4,SCG2,CP,CFI,TRARG1,MAP1LC3C,MAP6,TMEM63C,DNAH5,C1QTNF3,IL6
GO:BP	developmental growth	GO:0048589	0.0490022	1.30978	646	57	6	61806	SFRP2,FOXL2,TNN,ECM1,WNT7B,WNT3
