# Supplementary material for: Identification of Critical Genes for Ovine Horn Development Based on Transcriptome during the Embryonic Period
Source: Biology (Basel). 2023 Apr 13;12(4):591. doi: 10.3390/biology12040591 (PMC10136283; doi:10.3390/biology12040591)
Supplement: Supplementary file 1 [file biology-12-00591-s001.zip › Table S5. Top 5 hub genes of the protein-protein interaction network .xlsx]

## Sheet: Sheet1
Table S5. Top 5 hub genes of the protein-protein interaction network
name	Betweenness	BottleNeck	Closeness	ClusteringCoefficient	Degree	DMNC	EcCentricity	EPC	MCC	MNC	Radiality	Stress
WNT3	0	1	3	1	3	0.46346	0.14815	2.86	6	3	0.24691	0
SFRP4	0	1	3	1	3	0.46346	0.14815	2.848	6	3	0.24691	0
WNT7B	0	1	3	1	3	0.46346	0.14815	2.872	6	3	0.24691	0
SFRP2	0	1	3	1	3	0.46346	0.14815	2.866	6	3	0.24691	0
ACAN	24	7	5.5	0.1	5	0.30779	0.12963	3.432	5	2	0.90741	24
